1 **A cross-cohort analysis of autosomal DNA methylation sex differences in the term placenta**

2 Amy M. Inkster<sup>1,2</sup>, Victor Yuan<sup>1,2</sup>, Chaini Konwar<sup>1,3</sup>, Allison M. Matthews<sup>1,2,3,4</sup>, Carolyn J.

3 Brown<sup>2</sup>, Wendy P. Robinson<sup>1,2,\*</sup>.

4

5 1. BC Children's Hospital Research Institute, 950 W 28<sup>th</sup> Ave, Vancouver, Canada, V6H 3N1

6 2. Department of Medical Genetics, University of British Columbia, 4500 Oak St, Vancouver,

7 Canada, V6H 3N1

8 3. Centre for Molecular Medicine and Therapeutics, 950 W 28<sup>th</sup> Ave, Vancouver, Canada, V6H

9 3N1

10 4. Department of Pathology & Laboratory Medicine, University of British Columbia, 2211

11 Wesbrook Mall, Vancouver, Canada, V6T 1Z7

12 Corresponding author: Wendy P. Robinson ([wrobinson@bcchr.ca](mailto:wrobinson@bcchr.ca))

13

14

15

16

17

18

19

20

21

22

23

24 **ABSTRACT**

25 **Background**

26 Human placental DNA methylation (DNAm) data is a valuable resource for studying sex  
27 differences during gestation, as DNAm profiles after delivery reflect the cumulative effects of  
28 gene expression patterns and exposures across gestation. Here, we present an analysis of sex  
29 differences in autosomal patterns of DNAm in the uncomplicated term placenta (n=343) using  
30 the Illumina 450K array.

31 **Results**

32 Using a false discovery rate  $< 0.05$  and a mean sex difference in DNAm beta value of  $> 0.10$ ,  
33 we identified 162 autosomal CpG sites that were differentially methylated by sex, and that  
34 replicated in an independent cohort of samples (n=293). Several of these differentially  
35 methylated CpG sites were part of larger correlated regions of differential DNAm, and many  
36 also exhibited sex-specific DNAm variability. Although global DNAm levels did not differ by  
37 sex, the majority of significantly differentially methylated CpGs were more highly methylated in  
38 male placentae, the opposite of what is seen in differential methylation analyses of somatic  
39 tissues. Interestingly, patterns of autosomal DNAm at these significantly differentially  
40 methylated CpGs organized placental samples along a continuum, rather than into discrete male  
41 and female clusters, and sample position along the continuum was significantly associated with  
42 maternal age and newborn birthweight standard deviation.

43 **Conclusions**

44 Our results provide a comprehensive analysis of sex differences in autosomal DNAm in the  
45 term human placenta. We report a list of high-confidence autosomal sex-associated differentially

46 methylated CpGs, and identify several key features of these loci that suggest their relevance to  
47 sex differences observed in normative and complicated pregnancies.

48

49 **KEYWORDS**

50 DNA methylation, placenta, sex as a biological variable, sex differences, microarray, Illumina  
51 450K array, epigenetics, pregnancy

52

53 **BACKGROUND**

54 Sex is a key variable that influences biological systems from the level of the cell to the level of  
55 the organism. Considering cells, tissues, and organs, biological sex is typically defined by sex  
56 chromosome complement, which largely corresponds with the gonadal sex of the organism (1).

57 Biological sex is of particular importance in the study of human pregnancy and prenatal  
58 development as male fetal sex is a risk factor for several pregnancy complications including  
59 preterm birth, intrauterine growth restriction, and maternal gestational diabetes (2–6). Sex  
60 differences during prenatal development are likely affected by sex differences in the placenta, the  
61 organ critical for regulating growth and development of the embryo/fetus throughout gestation.  
62 Except in rare cases, placental cells harbor the same sex chromosome complement as the fetus,  
63 and sex differences in placental function, for example placental response to infection and stress,  
64 could contribute to sex differences in fetal growth and development (5,7,8).

65

66 Placental DNA methylation (DNAm) data provide valuable resource for studying sex  
67 differences during gestation, as DNAm profiles after delivery reflect the cumulative effects of  
68 gene expression patterns and exposures across gestation. In any tissue, when evaluating sex-

69 specific DNAm both autosomal and X chromosomal loci should be considered. Sex differences  
70 in X chromosome DNAm are extensive and expected, as DNAm plays a key role in the  
71 process of X chromosome inactivation (XCI), by which the one X chromosome in female cells  
72 becomes epigenetically silenced via the accumulation of heterochromatic marks (9,10). In  
73 contrast, the extent to which sex differences in autosomal DNAm patterns exist is less clear.  
74 Initial reports of sex-specific autosomal DNAm based on microarray data were later deemed  
75 false positives, attributed to probes determined *in silico* to have high sequence affinity to bind  
76 multiple genomic regions, many of which map to both autosomal and X or Y-linked loci (11,12).  
77 The removal of CpG sites measured by such cross-hybridizing probes is now commonplace prior  
78 to most analyses of DNAm data, but rarely are sex differences at the remaining autosomal CpGs  
79 investigated. As a result, literature investigating sex differences in placental autosomal DNAm  
80 and gene expression patterns is sparse. However, the handful of studies conducted using  
81 placentae from uncomplicated pregnancies suggest that the placenta harbors an appreciable  
82 number of autosomal loci with sex-specific DNAm profiles (13,14) and that a large proportion  
83 (potentially up to 60%) of sex-differentially expressed placental genes are autosomal (15,16).  
84  
85 In the context of pregnancy, autosomal epigenome-wide association studies are routinely  
86 conducted to investigate the effects of factors such as disease phenotypes including preeclampsia  
87 and intrauterine growth restriction, and environmental exposures such as pollution or maternal  
88 smoking, on the placental epigenome (17–22). Understanding how biological sex is associated  
89 with autosomal DNAm is a relatively unexplored facet of prenatal epigenetic research, and may  
90 shed light on the factors contributing to sex differences observed in growth and development  
91 throughout gestation. This study seeks to comprehensively characterize sex differences in the

92 uncomplicated, full-term (> 37 weeks of gestation) placental epigenome, with the aim of  
93 establishing a baseline of sex differences observed in the placental epigenome.

94

## 95 **METHODS**

### 96 **Datasets**

97 For the discovery cohort, placental Illumina Infinium HumanMethylation450 (450K) DNAm  
98 data obtained from liveborn deliveries were compiled from seven publicly available datasets  
99 from five North American cohorts (n=585). Datasets were selected on the basis of available  
100 infant birthweight and self-reported maternal ethnicity corresponding to one of three major  
101 ethnic identities (Black/African/African American, Asian/East Asian, European/White). The  
102 datasets compiled in this step include GSE73375 (n=9, North Carolina, USA) (23), GSE75428  
103 (n=289, Rhode Island Child Health Study, Rhode Island, USA) (24), GSE98224 (n=9, Toronto,  
104 Canada) (25), GSE74738, GSE100197, GSE108567, and GSE128827 (n=34, all Epigenetics in  
105 Pregnancy Complications Cohort, Vancouver, Canada) (26–29). These data were utilized as  
106 described in Yuan et al. 2019, to generate PlaNET, the Placental DNAm Elastic Net Ethnicity  
107 Tool, which estimates metrics of genetic ancestry from placental DNAm datasets (28).

108

109

110

111

112

113

114

115 *Table 1. Demographic characteristics of discovery and replication cohorts.*

|                                  | Discovery      |               |         | Replication       |                   |          |
|----------------------------------|----------------|---------------|---------|-------------------|-------------------|----------|
|                                  | Female (n=177) | Male (n=164)  | p value | Female (n=137)    | Male (n=156)      | p value  |
| <b>Gestational Age</b>           |                |               |         |                   |                   |          |
| Weeks                            | 39.0 (± 1.1)   | 39.1 (± 0.9)  | 0.53    | 39.6 (± 1.1)      | 39.7 (± 1.0)      | 0.28     |
| <b>Condition</b>                 |                |               |         |                   |                   |          |
| Healthy term                     | 100            | 100           | 0.02    | 114               | 125               | 0.10     |
| SGA                              | 37             | 45            |         | 9                 | 4                 |          |
| LGA                              | 40             | 19            |         | 13                | 24                |          |
| <b>PlaNET<sup>†</sup> Scores</b> |                |               |         |                   |                   |          |
| Coordinate 1 (mean (SD))         | 0.10 (± 0.25)  | 0.07 (± 0.23) | 0.27    | 0.0009 (± 0.0016) | 0.0012 (± 0.0018) | 0.000024 |
| Coordinate 2 (mean (SD))         | 0.11 (± 0.26)  | 0.05 (± 0.14) | 0.37    | 0.0038 (± 0.0270) | 0.0032 (± 0.0103) | 0.011    |
| Coordinate 3 (mean (SD))         | 0.78 (± 0.36)  | 0.88 (± 0.27) | 0.23    | 0.9951 (± 0.0279) | 0.9956 (± 0.0111) | 0.001    |

*SD refers to standard deviation, SGA and LGA refer to small (<10<sup>th</sup> centile) and large (>90<sup>th</sup> centile) birthweight for gestational age within each sex, as assigned by the original publications. \*p values are from Wilcoxon rank-sum tests for continuous and Fisher's exact test for categorical variables. † PlaNET coordinate 1 is associated with African ancestry, coordinate 2 with Asian ancestry, and coordinate 3 with European ancestry (28).*

116 For replication analyses, an independent North American dataset was used, the New Hampshire  
 117 Birth Cohort Study, New Hampshire, USA (n=293), GSE71678. Samples from the replication  
 118 dataset were kept independent from the discovery cohort during preprocessing and analysis,  
 119 analogous methods were used in both cohorts.

120

### 121 **Verification of sample sex and identity**

122 In both the discovery and replication cohorts, two approaches were used to verify that the sex  
 123 chromosomal complement of each sample corresponded to the sample sex as annotated in the  
 124 metadata. First, samples were subjected to hierarchical clustering on DNAm  $\beta$  values (a metric  
 125 ranging from 0 to 1 reflecting percent methylation) from only CpGs mapping to the X and Y  
 126 chromosomes (n=11,648). Two major clusters corresponding to male (XY) and female (XX)  
 127 samples were observed. Subsequently, samples were clustered using only the  $\beta$  values associated

128 with five CpGs in the X inactivation centre, which reflects the X chromosome complement as  
129 these probes are proportionally methylated to the number of chromosomes silenced by XCI (10).  
130 Again, two major groups of samples were observed: samples annotated as female fell into one  
131 cluster that we deemed “XX”, while samples annotated as male fell into the second, deemed the  
132 “X” cluster as this check gives no information about Y chromosome complement. Samples were  
133 confirmed to be male or female if both sex chromosome clustering checks agreed with sex as  
134 annotated in the sample metadata.

135  
136 Additionally, all samples were confirmed to be genetically unique using the “ewastools” R  
137 package (30). Two samples were found to be genetic duplicates in the replication cohort; after  
138 confirming by clustering on beta values from the 65 rs probes, these samples were both excluded  
139 from downstream analyses. Following sex and identity verification, the 65 rs genotyping probes  
140 on the 450K array and 11,648 CpGs mapping to the X and Y chromosomes were removed from  
141 both the discovery and replication datasets.

142

### 143 **Data processing and ancestry estimation**

144 All samples from the discovery cohort (n=585) were subjected to routine filtering and  
145 normalization as described in Yuan et al. 2019 (28). Briefly, CpGs removed included those  
146 targeted by non-specific probes (31,32), known placental-specific non-variable CpGs (range of  
147  $\beta$  values  $< 0.05$  between the 10<sup>th</sup>-90<sup>th</sup> centile in all samples in this cohort) (33), and those with  
148 poor quality data (detection P value  $> 0.01$  or bead count  $< 3$  in more than 1% of samples) (34).  
149 Data were normalized by the normal exponential out-of-band (noob) and beta mixture quantile  
150 (BMIQ) normalization methods from the R packages “wateRmelon” and “minfi”, respectively

151 (35). Samples were assigned values in three continuous ancestry coordinates, reflecting the  
152 probability of each sample being similar to 1000 Genomes Project populations of African, Asian,  
153 and European descent (28). Following the development of PlaNET, probes targeting  
154 polymorphic loci were also removed from this cohort (31,32), as were samples born before term  
155 (<37 weeks gestation) and/or affected by preeclampsia; this left 324,104 autosomal CpGs in 341  
156 samples available for sex-specific DNAm analysis.

157

158 The replication cohort was processed similarly; first, samples were restricted to those born >37  
159 weeks of gestation, no other pregnancy complications affected these samples according to the  
160 metadata. Next, ancestry was estimated using PlaNET, all samples were found to be  
161 predominantly of European ancestry, as reported in the original publication (21), and filtering  
162 was conducted identically to the discovery cohort. To correspond with the original publication of  
163 this dataset, functional and noob normalization were performed (21). After filtering and  
164 normalization, 341,939 autosomal CpGs in 293 samples remained for replication analyses.

165

### 166 **Global sex-specific DNAm profile analyses**

167 In order to study sex differences in global DNAm profiles, mean DNAm  $\beta$  values by sex at  
168 324,104 filtered autosomal loci and 12,329 additional CpGs annotated to autosomal Alu and  
169 LINE1 repetitive elements were investigated by non-parametric Kruskal-Wallis tests. CpGs in  
170 repetitive regions were identified by the overlap of Illumina probe locations and the UCSC hg19  
171 RepeatMasker track (36). The non -filtered dataset (n=473,929 CpGs, 341 samples) was used for  
172 this analysis as exclusion of CpGs in repetitive elements is a standard preprocessing step in  
173 EWAS. Additionally, sex differences in the proportions of fully methylated ( $\beta > 0.99$ ), highly



174 methylated ( $\beta > 0.90$ ), lowly-methylated ( $\beta < 0.10$ ), and unmethylated ( $\beta < 0.01$ ) autosomal CpG  
175 sites in the filtered dataset were evaluated by Wilcoxon rank-sum tests.

176

177 To test whether placental cell composition differed by sex, the relative proportions of  
178 trophoblast, syncytiotrophoblast, stromal, endothelial, Hofbauer, and nucleated red blood cells in  
179 all discovery cohort samples were estimated using the reference-based method implemented in  
180 PlaNET (28). Sex differences in cell type proportions were evaluated using a linear model with  
181 cell type proportion as the outcome variable, adjusting for gestational age, dataset location of  
182 origin (location), and PlaNET-inferred ancestry coordinates 2 and 3, included as continuous  
183 additive covariates in the linear model. As the predicted ancestry coordinates are compositional,  
184 coordinates 2 and 3 were selected as they had the highest mean values across samples of the 3  
185 coordinates.

186

### 187 **Identification of site-specific sex-associated autosomal DNAm**

188 Sex-specific autosomal differentially methylated positions (DMPs) were identified in the  
189 discovery cohort by linear modelling on log-transformed  $\beta$  values (M-values) using the limma  
190 package in R (37); gestational age, dataset of origin (location), and PlaNET coordinates 2 and 3  
191 were included as covariates. Sex differences in DNAm  $\beta$  values at each individual CpG site  
192 were calculated as  $\Delta\beta = \text{Average Male } \beta - \text{Average Female } \beta$ . Multiple test correction was  
193 performed with the Benjamini-Hochberg false-discovery rate (FDR) method. In the replication  
194 cohort, a similar model was used except that PlaNET-inferred ancestry coordinates were not  
195 included in the linear model, as the PlaNET-estimated ancestry of all 293 samples was extremely  
196 homogeneous (predominantly European), see Supplementary Figure 1. For all downstream

197 analysis, DMPs were considered replicated if they satisfied the following criteria in GSE71768:  
198  $FDR < 0.05$  and  $\Delta\beta > 0.05$  in the same direction as the discovery cohort.

199

### 200 **BLAST analysis for cryptic sex chromosome-associated DNAm**

201 Next, DMPs were evaluated for evidence of probe cross hybridization to other genomic loci,  
202 especially the sex chromosomes. As described in Chen et al. 2011, command-line nucleotide  
203 BLAST (blastn) was performed on the 50 nucleotide probe sequences for all replicated DMPs,  
204 searching against four versions of hg19 (*in silico* bisulfite converted fully methylated and fully  
205 unmethylated, both forward and reverse complement) (12). BLAST results representing the  
206 intended hybridization targets per the Illumina 450K array manifest were removed from the list  
207 of results, remaining sequences were considered non-specific with a BLAST match of at least 40  
208 sequential nucleotides and a nucleotide match at position 50. Non-specific DMPs with matches  
209 on the X or Y chromosome were removed from the list of replicated DMPs used in downstream  
210 analysis.

211

### 212 **Gene ontology analyses**

213 An enrichment analysis of biological process terms from the Gene Ontology collection was  
214 conducted on the genes associated with DMPs that replicated in our second cohort using the  
215 “gometh” and “goregion” functions from missMethyl, which accounts for potential bias from  
216 Illumina arrays measuring DNAm at multiple CpGs per gene (38). Genes associated with all  
217 324,104 autosomal CpGs tested for differential DNAm by sex were used as the background set.  
218 Gene ontology terms satisfying a threshold of  $FDR < 0.05$  were considered significantly enriched  
219 in the geneset associated with the top DMPs.

220

### 221 **Proximity to transcription factor binding motifs**

222 DMPs were examined for enrichment in proximity (100bp window with the CpG of interest at  
223 the centre) to transcription factor binding motifs from Homo sapiens Comprehensive Model  
224 Collection (HOCOMOCO) version 11 as compared to the background list of 324,104 filtered  
225 autosomal CpGs; this analysis was conducted using the CentriMo tool for local enrichment  
226 analysis from the Multiple Em for Motif Elicitation (MEME) Suite browser tool (39–41). In  
227 addition, enrichment for androgen receptor (AR) and estrogen receptor (ER)  $\alpha$  and  $\beta$  binding  
228 sites within a 100bp window with the CpG of interest at the centre was tested as compared to the  
229 input filtered autosomal probe set. Genomic coordinates of AR and ER binding sites were  
230 obtained from Wilson et al. 2016 and Grober et al. 2011 (42,43); enrichment was assessed using  
231 exact goodness-of-fit tests.

232

### 233 **Relationship between sex-specific DNAm and differentially expressed genes by sex**

234 Preprocessed and normalized placental gene expression data was downloaded for GSE75010,  
235 collected with the Affymetrix Human Gene 1.0 ST Array (44). Non-preeclamptic samples from  
236 this cohort born at or after 37 weeks of gestation were selected for our analyses (n=34, 47%  
237 female). The 65 genes covered by the Affymetrix array that overlapped replicated DMPs were  
238 tested for differential expression by sex via linear modelling, adjusting for maternal hypertension  
239 (yes/no), self-reported ethnicity, and gestational age at birth. Genes were considered  
240 differentially expressed by sex at nominal significance ( $p < 0.10$ ).

241

### 242 **Further characterization of differentially methylated CpG sites**

243 Differentially methylated genomic regions (DMRs) were identified using the R package  
244 DMRcate with  $\lambda=1000$  and  $C=2$  considering all 324,104 autosomal CpGs (45). DMRs were  
245 considered significant at an FDR  $< 0.05$  if comprised of at least 3 CpG sites with a mean  $\Delta\beta$   
246 across the region of  $> 0.05$  in either direction, calculated as  $\Delta\beta = \text{Average Male } \beta - \text{Average}$   
247 Female  $\beta$ . A lower  $\Delta\beta$  was tolerated in this analysis as it was a regional average.

248

249 DNAm loci that were differentially variable methylated positions by sex (DVPs) were identified  
250 using the iEVORA function from the “matrixTests” R package, with all 324,104 autosomal  
251 CpGs as input (46). This method was selected as it ranks selected features by differential mean  
252 DNAm t-test p values to decrease the likelihood of identifying differentially variable positions  
253 driven by single sample outliers (46). The cut and cutBfdr thresholds used were 0.05 and 0.001,  
254 respectively.

255

### 256 **Sex continuum analysis**

257 For a subset of samples from the Vancouver cohort (datasets GSE74738, GSE100197,  
258 GSE109567, GSE12887,  $n=34$ , 53% female), we had access to extended clinical information  
259 beyond the demographics presented in Table 1. These samples were selected from the discovery  
260 cohort to investigate associations between various clinical phenotypes and sample score along  
261 the first principal component of the 162 DMPs. Relationships between demographic variables  
262 and sample scores along the first principal component (PC1) were assessed by linear modelling,  
263 with PC1 score as the outcome variable and each clinical variable used as a predictor in  
264 independent models. Categorical variables informative across all samples included 450K array  
265 row, chip, and batch, positive maternal serum screen, and delivery type. Continuous variables

266 informative across all samples included gestational age, maternal body mass index, maternal age,  
267 birth weight, birthweight standard deviation z-score corrected for infant sex and gestational age,  
268 processing time between delivery and placental sampling, and the estimated proportion of major  
269 placental cell types estimated using the PlaNET algorithm.

270

## 271 **RESULTS**

### 272 **Genome-wide measures of DNAm do not differ by placental sex**

273 To investigate whether female (XX) and male (XY) term placentae had different global DNAm  
274 profiles, we tested for an association between sex and genome-wide DNAm using all autosomal  
275 CpGs in the filtered dataset (n=324,104). Neither the overall mean  $\beta$  value nor the proportions of  
276 highly methylated ( $> 0.90$ ), fully methylated ( $> 0.99$ ), or lowly methylated ( $< 0.10$ ) and  
277 unmethylated ( $< 0.01$ ) autosomal CpGs differed by sex in this cohort. Repetitive elements are  
278 frequently interrogated as surrogates for global DNAm as they comprise roughly 30% of all  
279 genomic nucleotides, as well as 30% of CpG dinucleotides (47). However, sex was not  
280 significantly associated with mean DNAm at Alu or LINE1 repetitive elements (Kruskal Wallis  
281  $p > 0.05$ ).

282

283 DNAm profiles obtained from bulk tissue such as whole blood, buccal swab, and placenta  
284 reflect the proportion-weighted composite methylomes of all contributing cell types. When  
285 studying bulk tissue DNAm, it is important to consider how sampling procedures and/or  
286 biology may alter relative cell type proportions in a biological sample, and how this may be  
287 reflected in results (48). We used the reference-based PlaNET algorithm to estimate the relative  
288 proportions of major placental cell types (trophoblasts, syncytiotrophoblasts, stromal cells,

289 Hofbauer cells (placental macrophages), and endothelial cells), and found that the relative cell  
290 type proportions did not differ by placental sex (Figure 1).

291

### 292 **Male placentae show higher DNAm at a subset of autosomal loci**

293 A linear model was fitted on M-values to test for differential DNAm by sex in the filtered  
294 dataset (n=324,104 autosomal CpGs), adjusting for gestational age at birth, dataset, and inferred  
295 genetic ancestry. The number of sex-associated CpG sites at various statistical (FDR) and  
296 biological ( $\Delta\beta$ ) thresholds were considered to evaluate the extent to which autosomal DNAm  
297 profiles in the placenta are affected by sex (Table 2).

298

299 To focus on CpGs more likely to be reproducible in future studies (27), CpGs were considered  
300 significantly differentially methylated by sex if they satisfied an  $FDR < 0.05$ , and an absolute  $\Delta\beta$   
301  $> 0.10$  between males and females. In total, 166 sex-associated differentially methylated  
302 positions (DMPs) fit these stringent criteria, of which 92% were more highly methylated in male  
303 samples than in females, a pattern that was observed across all thresholds considered (Figure 1,  
304 Table 2). See Supplementary Table 1 for the results of all investigated autosomal CpGs.

305

306 *Table 2. Results of linear modelling for sex-specific autosomal DNAm.*

|                      | $\Delta\beta > 0$ | $\Delta\beta > 0.05$ | $\Delta\beta > 0.10$ | $\Delta\beta > 0.20$ |
|----------------------|-------------------|----------------------|----------------------|----------------------|
| <b>FDR &lt; 0.05</b> | 24,715 (0.74)     | 2,942 (0.87)         | 166 (0.92)           | 4 (1.00)             |
| <b>FDR &lt; 0.01</b> | 14,108 (0.80)     | 2,682 (0.88)         | 166 (0.92)           | 4 (1.00)             |

307 *Number of significantly differentially methylated autosomal positions at various statistical and biological thresholds*

308 *are shown. FDR indicates the Benjamini-Hochberg false discovery rate,  $\Delta\beta$  refers to the difference in DNAm  $\beta$*

309 *value (male-female) and indicates the biological effect size between the sexes. The numbers in brackets indicate the*

310 *proportion of sites at each threshold level that are more highly methylated in male placentae.*

311  
312 We hypothesized that some DMPs may contribute to larger regions of correlated sex-specific  
313 DNAm, as several of the DMPs overlapped the same genes and genomic regions. To test this,  
314 we performed differentially methylated region (DMR) analysis in the discovery cohort.  
315 Significant DMRs were identified based on criteria of FDR < 0.05, spanning at least 3 CpGs, and  
316 having a mean  $\Delta\beta > 0.05$  across the region, a lower  $\Delta\beta$  was utilized in DMR analysis than in  
317 DMP analysis, as it reflected the average DNAm  $\beta$  of all composite CpGs. Eighty-seven DMRs  
318 comprised of 435 CpGs satisfied these criteria. The 87 DMRs ranged in size from 36 to 3306  
319 base pairs (mean 890 base pairs) and were comprised of an average of 5 CpGs per DMR; these  
320 regions were on average 6.3% differentially methylated between the sexes. Of the 87 DMRs, 29  
321 (33%) included one or more of the 166 identified DMPs, and conversely, 46 of the 166 DMPs  
322 (28%) were part of DMRs. It is likely that most of these DMPs are part of local regions of  
323 differential DNAm, but that the array coverage is not sufficient for their detection. Genes  
324 overlapping sex-specific DMRs included several from the chemokine ligand CCL family (2, 11,  
325 13), the keratin KRT family (6, 74), the LCE family (1B, 6A), the SPRR family (1A, 2A, 2C, 4),  
326 and the ZNF family (423, 300), including *ZNF300* and *ZNF423*, see Figure 2. *SERPINA6*  
327 overlapped a DMR more highly methylated in male samples. For a list of all identified DMRs,  
328 see Supplementary Table 2.

329

330 [ INSERT FIGURE 1 ]

331 **Figure 1.** Sex differences in autosomal DNAm patterns by placental sex.

332 **(A)** Estimated cell type proportions by sex in the discovery cohort, estimated using the R  
333 package PlaNET. Cell type proportions do not significantly differ by sex ( $p > 0.05$ ). **(B)** Volcano  
334 plot of all 324,104 autosomal CpG sites in the discovery cohort. Thresholds of statistical and

335 biological significance are depicted by horizontal ( $FDR < 0.01$ ) and vertical ( $\Delta\beta > 0.10$ )  
336 intercepts. Significantly differentially methylated autosomal CpG sites by sex ( $FDR < 0.01$ ,  $\Delta\beta >$   
337  $0.10$ ) are highlighted in colour to indicate direction of sex-biased DNAm. CpG sites in yellow  
338 have significantly higher average male DNAm at these thresholds, red sites exhibit higher  
339 female DNAm. CpG sites not significantly differentially methylated by sex at these thresholds  
340 are in grey. Each point represents a single CpG site,  $\Delta\beta = \beta_{avgmale} - \beta_{avgfemale}$ . The most  
341 differentially methylated CpG sites are annotated with associated genes names. **(C)** The number  
342 of differentially methylated ( $FDR < 0.05$ ) CpG sites at various  $\Delta\beta$  thresholds; DMPs that are more  
343 highly methylated in male samples are indicated in red, DMPs more highly methylated in female  
344 samples are indicated in orange. **(D)** Percentage of DMPs at various  $\Delta\beta$  thresholds that replicate  
345 ( $FDR < 0.05$ ,  $\Delta\beta$  same direction) in GSE71678, colored by sex with higher DNAm. **(E)** For all  
346 DMPs at the  $\Delta\beta$  thresholds considered, the percentage of DMPs with higher male DNAm.

347

### 348 **More highly variable DNAm loci in female placentae**

349 In addition to differences in mean DNAm at individual CpGs (DMPs), the DNAm variability  
350 may also vary by sex (DVPs). We undertook a DVP analysis in this study as part of a  
351 comprehensive characterization of sex differences in the placental DNA methylome, as to our  
352 knowledge no previous placental DVP studies have been reported, including related to sex.  
353 Differential variability in DNAm is an intriguing molecular feature often identified in cancer,  
354 which has many molecular correlates to successful placentation (49). A total of 3,148 significant  
355 ( $FDR < 0.001$ ) DVPs were identified between the sexes, the majority of which were more highly  
356 variable in female samples than in male samples ( $n=3,170$ , 82%). Although no biological  
357 processes were significantly overrepresented in the gene set associated with these DVPs, the 6



358 nominally significant ( $p < 0.05$ ) biological processes associated with DVPs between the sexes  
359 were related to cornification and keratinization, as well as neurological processes such as axon  
360 guidance, cerebral cell migration, glial cell-derived neurotrophic factor receptor signaling,  
361 negative regulation of neuron apoptosis, and dopamine uptake in synaptic transmission.  
362 Interpreting gene ontology enrichment analysis results in the placenta is difficult, though, as  
363 functional gene annotations provided in public databases are not placenta-specific, and genes in  
364 the placenta may function differently than in other tissues. Additionally, 19 of the DVPs were  
365 also DMPs ( $FDR < 0.05$  and  $\Delta\beta > 0.10$ ) including CpG sites in the *SPON1* gene, see Figure 2.  
366 The results of the differential variability analysis are available in Supplementary Table 3.

367

### 368 **Replication of sex differences in DNAm**

369 In EWAS studies, it is important to evaluate the robustness of any findings in an independent  
370 dataset to increase the likelihood of true positive findings. For replication, linear modelling was  
371 conducted to identify DMPs by sex in an independently processed Illumina 450K dataset,  
372 GSE71678 ( $n=293$ , 47% female). Because differences in DNAm ( $\Delta\beta$ ) are related to both  
373 biological and technical variables, and can vary for technical reasons alone by as much as 0.03-  
374 0.05, we used a less stringent  $\Delta\beta$  threshold to define replication (27,33). Of the 166 DMPs  
375 identified in the discovery cohort, 98% ( $n=163$ ) replicated at an  $FDR < 0.05$  and  $\Delta\beta > 0$  in the  
376 same direction as observed in the discovery cohort, see Figure 1.

377

### 378 **Genomic cross-reactivity of probes underlying sex-specific DNAm**

379 DNAm at CpGs targeted by Illumina's DNAm microarray is measured by 50 nucleotide  
380 probes that may cross-hybridize to off-target autosomal and sex chromosomal loci, and therefore

381 have the potential to yield false positive results for sex-specific autosomal DNAm (12). To  
382 exclude the possibility that the sex-specific autosomal DNAm observed in this study was the  
383 result of sex chromosome cross-reactivity, we BLAST-ed the probe sequences associated with  
384 the replicated 163 DMPs against the hg19 human reference genome. We assessed all BLAST  
385 results matching greater than 40 nucleotides of the probe body with >90% sequence identity, and  
386 overlapping the 50<sup>th</sup> nucleotide position (the CpG, hybridization at this nucleotide required for  
387 single base extension and fluorescence detection). Chen et al. and Price et al. used similar criteria  
388 define potential cross-hybridization (31,32), although we chose to tolerate sequence matches  
389 with gaps in the interest of discovering even low-probability cross-reactivity to the sex  
390 chromosomes, as other studies have shown that 50-mer microarray probes may cross-hybridize  
391 to unintended regions with as little as 75-80% sequence identity if as few as 14 contiguous  
392 nucleotides match (50).

393

394 At these thresholds, only one probe showed evidence for possible cross reactivity to the sex  
395 chromosomes: cg02325951, which underlies a CpG site in the gene body of *FOXN3*. In the  
396 ProbeSeqA target sequence for this probe, 43 nucleotides match a region on the p arm of the X  
397 chromosome, approximately 1kb upstream of *HSD17B10* (chrX: 53467618-53467660). As we  
398 could not confidently determine whether the sex-specific DNAm observed at this CpG could be  
399 attributed to the intended genomic target (chr14: 89878619-89878668), we chose to exclude this  
400 CpG from downstream analyses of replicated hits (Supplementary Figure 2). This probe has  
401 previously been reported to be differentially methylated by sex in the placenta (13,14).

402

403 **Characterization of autosomal sex-specific DMPs**

404 The remaining 162 replicated and BLAST-ed DMPs were subsequently investigated for  
405 biological meaning. We observed no enrichment of specific genomic region locations (gene  
406 bodies, promoters, intragenic regions), on any particular autosomal chromosome, or for their  
407 position relative to CpG islands (located in CpG islands, shores, or shelves). Gene ontology  
408 analysis revealed significant enrichment for 10 biological process terms, which could be largely  
409 divided into two categories, the first related to chemokines/chemotaxis and immune function  
410 (chemotaxis; eosinophil, monocyte, and lymphocyte chemotaxis; chemokine-mediated signaling;  
411 cellular response to interleukin-1), and the second related to epithelial barrier function (peptide  
412 cross-linking, keratinocyte differentiation, keratinization, and cornification).

413

#### 414 **Association with gene expression and transcription factor binding sites**

415 We then tested whether the 65 genes associated with the 162 DMPs displayed sex-biased  
416 expression patterns. Of these 65 genes, only 8 were significantly differentially expressed  
417 between male and female placentae ( $p < 0.10$ ), however this cohort of uncomplicated term  
418 placentae was small and therefore lacked statistical power ( $n=34$  samples, 47% female). One  
419 such differentially expressed gene was *ZNF300*, which harbored a promoter DMP more highly  
420 methylated in males, and was more highly expressed in female placentae. *ZNF300* has been  
421 previously reported to be more highly expressed in 46,XX human placentas (16).

422

423 Changes to DNAm at transcription factor binding motifs genome-wide can affect the efficiency  
424 of TF binding, either positively or negatively depending on the transcription factor, and may thus  
425 interact with gene expression patterns (51). Binding motifs for six transcription factors were  
426 significantly overrepresented within 100 nucleotide windows around the top DMPs (adjusted P

427 value < 0.05 and CentriMo E-value < 1). These included motifs for AHR, ATF3, GMEB2,  
428 ZBT14, and two binding motifs for the KAISO protein (encoded by *ZBTB33*), see Table 3.  
429 *ZBTB33* is located on the X chromosome (Xq24), while the other transcription factors are  
430 encoded by autosomal genes. These transcription factors *AHR*, *ATF3*, *GMEB2*, *ZBTB33*, and  
431 *ZBTB14* were confirmed to be robustly expressed in the term placenta using dataset GSE75010,  
432 all five were more highly expressed than the median expression log2 counts-per-million of all  
433 placentally-expressed transcripts.

434

435 *Table 3. Transcription factor binding motifs overrepresented within 100bp of the top 162 DMPs.*

| Motif ID              | Coding Gene   | Chromosome | Consensus Seq   | E-value | adj P value |
|-----------------------|---------------|------------|-----------------|---------|-------------|
| AHR_HUMAN.H11MO.0.B   | <i>AHR</i>    | 7          | DTYGCGTGM       | 0.00    | 5.60E-14    |
| ATF3_HUMAN.H11MO.0.A  | <i>ATF3</i>   | 1          | GGTSACGTGAB     | 0.04    | 5.30E-05    |
| GMEB2_HUMAN.H11MO.0.D | <i>GMEB2</i>  | 20         | NBKTACGTVRN     | 0.00    | 2.50E-08    |
| KAISO_HUMAN.H11MO.0.A | <i>ZBTB33</i> | X          | SARRYCTCGCGAGAV | 0.00    | 9.30E-09    |
| KAISO_HUMAN.H11MO.1.A | <i>ZBTB33</i> | X          | TMTCGCGAGAN     | 0.00    | 1.30E-06    |
| ZBT14_HUMAN.H11MO.0.C | <i>ZBTB14</i> | 18         | GGAGCGCGC       | 0.09    | 1.20E-04    |

436 *Consensus sequences are indicated with IUPAC nucleotide codes. E values refer to the central enrichment test*  
437 *statistic employed by CentriMo, indicating the likelihood for motif enrichment near the DMP.*

438

439 We further tested whether the 162 DMPs were enriched for proximity to ER  $\alpha$  and  $\beta$  and AR  
440 binding sites, as molecular sex differences can arise in general from the action of either sex  
441 chromosomes or sex hormones (1). We found no enrichment for ER  $\alpha/\beta$  or AR binding sites  
442 within 200 base pair windows of the top DMPs, centered around the CpG of interest. However,  
443 there were two DMPs that overlapped AR and ER  $\beta$  binding sites, respectively. An intergenic

444 CpG site on chromosome 8 overlapped an AR binding site, while a CpG site in the body of  
445 *SPON1* overlapped an ER  $\beta$  binding site, see Figure 2.

446

447 [ INSERT FIGURE 2 ]

448 **Figure 2.** Scatterplots of sex-differentially methylated regions and probes in key genes.

449 **(A)** Differentially methylated region spanning 5 CpGs in ZNF300 in chromosome 5, male  
450 samples are indicated in red, females in orange; the CpG coordinates along chromosome 5 are  
451 indicated on the X axis, while DNA methylation  $\beta$  values for each sample are plotted along the Y  
452 axis. CpG sites that are also significantly differentially variable (DVP) are indicated by circular  
453 scatter points. Below is the gene model from the UCSC Genome Browser track with the CpG  
454 positions indicated. **(B)** A differentially methylated region in ZNF423, coordinates along  
455 chromosome 16 are indicated on the X axis. **(C)** A significantly differentially methylated CpG  
456 site in the gene body of SPON1, this site overlaps an estrogen receptor  $\beta$  binding site.

457

#### 458 **Limited overlap of DMPs with previous studies**

459 To contextualize the results of this study in the existing literature, we considered the overlap  
460 between DMPs identified as sex-associated in this study at an FDR < 0.05 (n=24,715) and two  
461 similar previous placental DNAm studies (Table 4) (13,14). Due to different preprocessing  
462 criteria, and the fact that both previous studies relied on probes common to the 27k and 450k  
463 Illumina DNAm array platforms, not all identified DMPs in these studies were covered by  
464 probes in our dataset, and thus we restricted to comparing those that were. There was no overlap  
465 between DMPs found in our study and the 17 DMPs from Martin et al. (2017) (13), which only  
466 included preterm births <28 weeks of gestational age. However, 84 of the 335 (255) DMPs and

467 154/335 genes identified by Mayne et al. 2017 were also identified as part of our 166 DMPs  
468 (14).

469

470 *Table 4. Overlap of placental autosomal differentially methylated CpGs reported in this study with previous*  
471 *literature.*

| <i>Study</i>                                   | <i>Martin et al. 2017</i> | <i>Mayne et al. 2017</i> |
|------------------------------------------------|---------------------------|--------------------------|
| Sample size (n, % female)                      | 84 (69%)                  | 62 (56%)                 |
| Gestational age (mean weeks)                   | 25.5                      | ≥37                      |
| Autosomal DMPs (n)                             | 91                        | 420                      |
| Autosomal DMPs with higher male $\beta$ (%)    | 83%                       | 100%                     |
| Autosomal DMP probes covered in this study (n) | 17/91                     | 335/420                  |
| Overlap with present study                     |                           |                          |
| FDR<0.05, $\Delta\beta$ >0.10 (n=162)          | 0/17                      | 0/335                    |
| FDR<0.05, no $\Delta\beta$ (n=24,715)          | 0/17                      | 84/335                   |
| Genes at FDR<0.05 (n=6,733)                    | 0/17                      | 154/335                  |

472 *Due to differences in probe filtering, not all DMPs reported in previous studies are covered by probes in the filtered*  
473 *dataset of 324,104 autosomal CpGs used here. As such, overlap was only considered at CpGs reported in both the*  
474 *previous studies and the current study. Accordingly, 17/91 DMPs reported by Martin et al. fit this criteria, and*  
475 *335/420 DMPs from Mayne et al..*

476

#### 477 **Combined effect of sex-specific DNAm at DMPs**

478 To evaluate the combined effect of differential methylation at the 162 DMPs, we performed  
479 principal components analysis on the  $\beta$  values associated with these sites in all samples.

480 Although both PC1 (37.1% variance) and PC2 (4.76% variance) were significantly associated  
481 with sample sex (ANOVA  $p < 0.05$ , respectively), rather than samples forming clearly delineated  
482 “male” and “female” clusters in PC space, they were instead distributed across PC1 in a  
483 continuum of sex, see Figure 3.

484

485 As sex biases are observed in the frequency and severity of many pregnancy complications, we  
486 hypothesized that a sample's position along this continuum of sex (PC1) may be associated with  
487 sex-specific clinical features, such as birthweight. Using a subset of 34 samples from the  
488 discovery cohort for which we had extended metadata, we tested for a relationship between PC1  
489 score and the following variables: positive maternal serum screen, delivery type, gestational age  
490 at birth, maternal body mass index, maternal age, birthweight standard deviation z-score adjusted  
491 for infant sex and gestational age, and the estimated proportion of major placental cell types  
492 estimated using the PlaNET algorithm. We also tested for associations with potential technical  
493 confounders including sample processing time after delivery and 450k array row, chip, and  
494 batch. When considering both sexes together, no clinical or technical characteristics informative  
495 across all samples were significantly associated with sample position along PC1. However, when  
496 stratifying analyses by sex, maternal age was significantly positively associated with PC1 score  
497 in males (higher maternal age in towards the male end of the continuum), while birthweight  
498 standard deviation was significantly positively associated with PC1 score in female samples  
499 (higher birthweight standard deviation toward the female end of the continuum).

500

501 [ INSERT FIGURE 3 ]

502 **Figure 3.** Principal components analysis of DNAm at the 162 significantly sex-differentially  
503 methylated CpGs. **(A)** Density plot of male (M, red curve) and female (F, yellow curve) samples  
504 along the first principal component. Principal components analysis was conducted on the  
505 discovery cohort based on the DNAm  $\beta$  values at the 162 sex-associated DMPs. **(B)** Scatterplot  
506 of principal component 1 versus principal component 2 of the discovery cohort., male (M)  
507 samples are plotted in red, females (F) in yellow. **(C)** Significant associations between clinical

508 variables and the first principal component in a subset of 34 samples with extended metadata.  $R^2$   
509 and p values are reported for each significant variable. Yellow arrow indicates female-only  
510 significant association, red arrow indicates male-only significant association. PC: principal  
511 component.

512

513 We also leveraged the principal components analysis to further investigate the relationship  
514 between gestational age and sex chromosome complement with patterns of DNAm at the top  
515 differentially methylated loci. Twenty four second trimester and early third trimester samples  
516 (21-32 weeks), including three with 45,X chromosome complements were projected into the  
517 PCA space associated with the 162 differentially methylated CpG sites in the discovery cohort.  
518 The younger gestational age male and female samples still formed a sex continuum, but were  
519 localized to the top half of the plot, indicating that PC2 is associated with gestational age  
520 ( $p < 2.2e-16$ ). The 45,X samples were found to localize to the ‘male’ side of the first principal  
521 component within this cluster of younger GA samples, see Supplementary Figure 4.

522

## 523 **DISCUSSION**

524 We undertook this study to identify the extent to which the human placenta exhibits true patterns  
525 of sex-specific autosomal DNA methylation, after rigorously accounting for probe cross-  
526 reactivity to the sex chromosomes. By compiling a dataset profiling DNAm in 341 term  
527 placentae, we identified, replicated, and analyzed the biological significance of sex-associated  
528 placental autosomal DNAm. There was no evidence for sex differences in placental cell type  
529 proportions underlying autosomal DNAm sex differences, nor was there a significant difference  
530 in global mean DNAm level by sex. Turning to individual CpG sites, we identified 162 DMPs



531 across all autosomes that showed robust DNAm differences by placental sex with no evidence  
532 for cross-reactivity to the sex chromosomes. Functionally, these DMPs were enriched to be in or  
533 near genes associated with biological process gene ontology terms related to chemokines or  
534 chemotaxis and immune function or epithelial barrier function.

535

536 Of the 162 sex-associated DMPs identified, >90% were more highly methylated in male  
537 placental samples than in female samples, and this trend held true at all biological and statistical  
538 thresholds considered. Interestingly, EWAS of somatic tissues have revealed the opposite  
539 pattern, across studies the majority of somatic sex-associated DMPs are more highly methylated  
540 in female samples (52). This has been reported in studies of blood (53,54), buccal swab (53),  
541 prefrontal cortex (55), pancreatic islets (56), and also in a meta-analysis of 36 somatic tissues  
542 (52). It is interesting to see the opposite trend in placenta (more DMPs with higher male  
543 DNAm), but perhaps not surprising, as this pattern was previously reported in a study of  
544 placental autosomal DNAm (13). Additionally, a study of placental DNAm by whole-genome  
545 oxidative bisulfite sequencing identified that male placentae are on the order of 1-2% more  
546 highly methylated overall than females (57); although we saw no significant difference in array-  
547 wide average DNAm by sex, this could be related to the uneven probe distribution of the 450K  
548 array, which are concentrated in functionally relevant areas (58). While the underlying cause of  
549 such a pattern is unclear, our investigation into a limited sample of placentae with a 45,X  
550 karyotype may suggest a role for X chromosome dosage. Studies of sex chromosome  
551 aneuploidies have revealed extensive influences of X chromosome dosage on DNAm profiles  
552 autosomal loci, for example in females affected by Turner syndrome and males affected by  
553 Klinefelter syndrome (59,60). Additionally, as it has been proposed that X chromosome

554 inactivation may be distinct (less complete) in the human placenta as compared to somatic  
555 tissues (61). It is possible that the placental inactive X may interact differently with autosomal  
556 loci than in somatic tissues.

557

558 In interpreting the biological significance of the 162 sex-associated DMPs, the genes overlapping  
559 these loci were enriched for biological process gene ontology terms related to chemokines and  
560 chemotaxis, as well as to the process of keratinization. This may suggest that the placenta  
561 mediates sex differential immune function and/or placental trophoblast structure or function  
562 during gestation, as genes from the KRT or keratin gene family are often used as cell-surface  
563 markers of placental trophoblasts (62), the most abundant placental cell type (63). Several genes  
564 from the ZNF family also overlapped DMPs and DMRs. *ZNF423* and *ZNF300*, specifically,  
565 overlap DMPs that are more highly methylated in male samples, and are both DNA-binding  
566 Krüppel-like C2H2 zinc finger transcription factors (64). *ZNF300* has been reported to be more  
567 highly expressed in female placentae in a study of first trimester conceptuses (16), this is  
568 consistent with the higher male DNAm in the *ZNF300* promoter we observe here (Figure 2).  
569 *ZNF423* was recently reported to regulate networks of gene co-expression (co-expression  
570 modules) in the human placenta that are conserved across gestation (15). Along with the *ENFI*  
571 gene, *ZNF423* regulated the most highly conserved placental co-expression module between  
572 humans and mice, suggesting the importance of *ZNF423* in the regulation of patterns of placental  
573 gene expression. To our knowledge, sex differences in placental DNAm of *ZNF423* have not  
574 previously been reported, nor were sex differences in the *ZNF423* co-expression module  
575 reported. The sex-specific DNAm observed in this study across *ZNF423* could suggest that the  
576 conserved placental co-expression module identified by Buckberry et al. may be regulated in a

577 sex-specific manner. For the plots shown in Figure 2, the location of all CpG sites shown  
578 aligned with the RefGene and ChromHMM tracks from the UCSC Human Genome Browser  
579 (65) are available in Supplementary Figure 3.

580

581 To understand the extent to which our DMPs were related to sex differences in placental gene  
582 expression, we investigated placental microarray expression data for the 65 genes overlapping  
583 the 162 DMPs identified. Although 12% of the 65 genes overlapping the 162 DMPs showed sex-  
584 specific placental expression, the majority were not significantly differentially expressed by  
585 placental sex. This is may be related to the small sample size of the gene expression cohort  
586 utilized (n=34), the role of additional factors beyond DNAm in regulating gene expression, and  
587 the possibility of alternative splicing and sex-specific isoform expression, which would not be  
588 captured in microarray analysis (66). Additionally, sex differences in DNAm at these 162  
589 DMPs may be involved in regulating the expression of genes beyond those they overlap, which  
590 would not have been captured in this candidate gene expression analysis.

591

592 Both sex chromosome complement and relative sex hormone concentration can influence sex  
593 differences during gestation, as the conceptus harbors a sex chromosome complement and fetal  
594 testosterone begins to be produced by both sexes in the mid-first trimester (67). In the absence of  
595 amniotic fluid hormone measurements, we cannot comment extensively on the role fetal sex  
596 hormones play in establishing the DNAm profiles at these DMPs. However, DNAm profiles in  
597 female 45,X placental samples appeared more male-like in principal components analysis of the  
598 162 DMPs, suggesting X chromosome complement may be associated with sex differences in  
599 placental autosomal DNAm. A further link between DMP DNAm profiles and the sex

600 chromosomes was found in the enrichment for overlap with KAISO protein binding motifs.  
601 KAISO is a transcription factor encoded by the X-linked *ZBTB33* gene, and has been reported to  
602 repress gene expression by binding methylated DNA (68). The fact that *ZBTB33* is X-linked may  
603 imply the existence of interactions between the sex chromosomal and autosomal loci in the  
604 placenta. Furthermore, we found no association of differential DNAm with nearby ER or AR  
605 binding sites, making it less likely that hormone effects underly these differences.

606

607 Another outcome of our principal components analysis was the ability to observe associations  
608 between DNAm profiles at the 162 DMPs and sample demographic characteristics.  
609 Interestingly, we found that across the first principal component, in male samples increased  
610 maternal age was significantly associated with falling toward the male extreme of the  
611 continuum, while amongst females increased birthweight standard deviation was associated with  
612 the female end of the continuum. While maternal age has been positively associated with  
613 increased risk of preeclampsia development, we are not aware of sex differences in preeclampsia  
614 risk by maternal age (69). Conversely, birthweight standard deviation is a metric that is  
615 calculated using sex- and gestational age-adjusted growth curves, and as such is independent of  
616 both sex and gestational age. Although birthweight standard deviation was not expected to and  
617 did not differ significantly by sex in these cases, within the female samples a higher birthweight  
618 standard deviation was associated with those samples localizing toward the female extreme of  
619 PC1. While there are known sex differences in average birthweight, with males tending to be  
620 born heavier than females, to our knowledge this is the first report suggesting that placental  
621 molecular features may interact with intra-sex birthweight distributions.

622

623 In comparing the DMPs discovered in this study to findings previously reported in the human  
624 placenta (13,14) we observed limited overlap, although all of the 85 DMPs from our study  
625 overlapped with previous reports were differentially methylated in the same direction by sex as  
626 previously reported. Limited overlap may partially relate to cohort size, as the cohort used in this  
627 study is larger than any used previously (341 samples versus 62 and 84 samples), increasing our  
628 power to detect true positive sex differences. Despite imperfect overlap with previous studies, we  
629 observed a high degree of DMP reproducibility between our discovery and replication cohorts,  
630 suggesting that the 162 DMPs identified here show consistent sex differences in placental  
631 autosomal DNA.

632

633 We acknowledge several limitations of our findings. First, because the discovery cohort utilized  
634 is largely of European and East Asian ancestry, and the replication dataset is comprised  
635 exclusively of European ancestry samples (21), our results may not generalize to other ancestral  
636 populations. This is a limitation applying to nearly every large-scale epigenome or genome-wide  
637 association study (70,71), and inclusion of samples of diverse ancestry should be considered in  
638 the construction of future cohorts. Second, although enriched for coverage of functional genomic  
639 regions and RefSeq genes, the Illumina 450K array does not provide coverage of all genomic  
640 CpGs, specifically in non-coding regions. Higher-resolution technologies such as the Illumina  
641 EPIC array or whole-genome bisulfite sequencing can address this limitation. Further, we could  
642 not directly examine the relationship between placental DNAm and fetal sex hormone levels in  
643 amniotic fluid. We acknowledge that by term, both sex chromosome complement and sex  
644 hormone levels have had ample opportunity to exert their effects, and thus we cannot disentangle  
645 which patterns of sex-specific DNAm observed may be related to each.

646

647 **PERSPECTIVES & SIGNIFICANCE**

648 In summary, we find that autosomal sex differences in DNAm exist in the human placenta, and  
649 in contrast to somatic tissues the majority of placental autosomal sex-differentially methylated  
650 CpG sites are more highly methylated in male samples. Additionally, patterns of DNAm at  
651 these CpG sites suggest that male (XY) and female (XX) placenta vary continuously, rather than  
652 discretely, at these autosomal loci. These results are intended to establish a baseline for sex  
653 differences existing in the uncomplicated term placenta's autosomal methylome, and we  
654 anticipate that they will be useful to contextualize results of analyses from the placentae of  
655 complicated pregnancies, especially those complications with sex-biased phenotypes such as  
656 preterm birth and early-onset preeclampsia

657

658 **CONCLUSIONS**

659 Overall, our study reports high-confidence and large-effect size autosomal sex-associated DMPs  
660 in the human placenta, and identifies several key features of these loci that suggest their potential  
661 relevance to sex differences observed in normative and complicated human gestations. It remains  
662 to be determined how these patterns of sex-specific placental DNAm arise, and what their  
663 functional implications are. We hope our findings facilitate future investigation of sex  
664 differences in placental molecular features as a means to investigating the causes and  
665 consequences of sex differences in pregnancy.

666

667 **DECLARATIONS**

668 **Ethics approval and consent to participate**

669 Ethics approval for use of human research subjects in this study was obtained from the  
670 University of British Columbia/Children's and Women's Health Centre of British Columbia  
671 Research Ethics Board (H18-01695). Informed written consent was obtained from all study  
672 participants.

673

#### 674 **Consent for publication**

675 Not applicable.

676

#### 677 **Availability of data and materials**

678 All datasets used are publicly available via the Gene Expression Omnibus at the indicated  
679 accession numbers (<https://www.ncbi.nlm.nih.gov/geo/>).

680

#### 681 **Competing interests**

682 The authors declare that they have no competing interests.

683

#### 684 **Funding**

685 This work was supported by a Canadian Institutes of Health Research (CIHR) grant to WPR  
686 [SVB-158613 and F19-04091]. WPR holds a CIHR Research Chair in Sex and Gender Science  
687 [GSK-171375] and receives salary support through an investigatorship award from the BC  
688 Children's Hospital Research Institute, AMI receives support from a CIHR Doctoral Fellowship.

689

#### 690 **Authors' contributions**

691 AMI contributed to study design, data preparation, and performed data analysis, interpretation,  
692 and drafted the manuscript. VY contributed to study design and prepared the datasets that  
693 compose the discovery cohort. CK contributed to study design and analysis. WPR, CJB, and  
694 AMM conceived of and supported the study, and contributed to data analysis and interpretation  
695 of the results. All authors read and provided critical feedback on the manuscript, and approved  
696 the final version.

697

## 698 **Acknowledgements**

699 We thank all cohort owners and the scientific community for their commitment to making  
700 scientific data publicly available, and we thank all study participants for the generous donation of  
701 samples. We acknowledge members of the Robinson lab for thoughtful discussion and feedback  
702 on the analysis and manuscript, especially Giulia F. Del Gobbo, Dr. Maria Peñaherrera A., and  
703 Dr. Johanna Schuetz.

704

## 705 **ADDITIONAL FILES**

### 706 **Supplementary Figures (suppfigures.pdf)**

707 Title: Supplementary figure files

708 Description: Supplementary figures 1-4 with corresponding titles and figure captions.

709

### 710 **Supplementary Table 1 (supptable\_1.xlsx)**

711 Title: Results of linear modelling for all 324,104 autosomal CpGs tested

712 Description: Linear modelling statistics for sex differential methylation analysis at all 324,104  
713 autosomal CpG sites in the filtered dataset.



714

715 **Supplementary Table 2 (supptable\_2.xlsx)**

716 Title: Table of significant placental autosomal sex-associated DMRs

717 Description: Summary statistics and genomic locations of all significant sex-associated DMRs  
718 identified.

719

720 **Supplementary Table 3 (supptable\_3.xlsx)**

721 Title: Table of significant placental autosomal sex-associated DVPs

722 Description: Summary statistics and genomic locations of differential variability analysis for all  
723 significant sex-associated DVPs.

724

725 **ABBREVIATIONS**

726 450K – Illumina HumanMethylation450 Array

727 ANOVA – analysis of variance

728 AR – androgen receptor

729 BLAST – basic local alignment search tool

730 BMIQ – Beta-Mixture Quantile Normalization

731 CpG – cytosine-guanine dinucleotide

732 DMP – differentially methylated position (1 CpG)

733 DMR – differentially methylated genomic region (>1 CpG)

734 DNAm – DNA methylation

735 DVP – differentially variably methylated position (1 CpG)

736 ER – estrogen receptor

737 FDR – Benjamini-Hochberg false discovery rate  
738 LGA – large birthweight for gestational age  
739 PC – principal component  
740 PCA – principal components analysis  
741 PlaNET – Placental DNAmE Elastic Net Ethnicity Tool  
742 SD – standard deviation  
743 SGA – small birthweight for gestational age  
744 XCI – X chromosome inactivation

745

746 **REFERENCES**

- 747 1. Arnold AP. A general theory of sexual differentiation. *J Neurosci Res.* 2017 02;95(1–2):291–  
748 300.
- 749 2. Sandman CA, Glynn LM, Davis EP. Is there a viability–vulnerability tradeoff? Sex  
750 differences in fetal programming. *Journal of Psychosomatic Research.* 2013 Oct 1;75(4):327–  
751 35.
- 752 3. Challis J, Newnham J, Petraglia F, Yeganegi M, Bocking A. Fetal sex and preterm birth.  
753 *Placenta.* 2013 Feb 1;34(2):95–9.
- 754 4. Di Renzo GC, Rosati A, Sarti RD, Cruciani L, Cutuli AM. Does fetal sex affect pregnancy  
755 outcome? *Gender Medicine.* 2007 Mar 1;4(1):19–30.
- 756 5. Clifton VL. Review: Sex and the Human Placenta: Mediating Differential Strategies of Fetal  
757 Growth and Survival. *Placenta.* 2010 Mar 1;31:S33–9.
- 758 6. Broere-Brown ZA, Adank MC, Benschop L, Tielemans M, Muka T, Gonçalves R, et al. Fetal  
759 sex and maternal pregnancy outcomes: a systematic review and meta-analysis. *Biol Sex*

- 760 Differ [Internet]. 2020 May 11;11. Available from:  
761 <https://www.ncbi.nlm.nih.gov/pmc/articles/PMC7216628/>
- 762 7. Bale TL. The placenta and neurodevelopment: sex differences in prenatal vulnerability.  
763 *Dialogues Clin Neurosci*. 2016 Dec;18(4):459–64.
- 764 8. Rosenfeld CS. Sex-Specific Placental Responses in Fetal Development. *Endocrinology*. 2015  
765 Oct 1;156(10):3422–34.
- 766 9. Sharp AJ, Stathaki E, Migliavacca E, Brahmachary M, Montgomery SB, Dupre Y, et al.  
767 DNA methylation profiles of human active and inactive X chromosomes. *Genome Res*  
768 [Internet]. 2011 Aug 23 [cited 2018 Apr 23]; Available from:  
769 <http://genome.cshlp.org/content/early/2011/08/23/gr.112680.110>
- 770 10. Cotton AM, Price EM, Jones MJ, Balaton BP, Kobor MS, Brown CJ. Landscape of DNA  
771 methylation on the X chromosome reflects CpG density, functional chromatin state and X-  
772 chromosome inactivation. *Hum Mol Genet*. 2015 Mar 15;24(6):1528–39.
- 773 11. Blair JD, Price EM. Illuminating Potential Technical Artifacts of DNA-Methylation Array  
774 Probes. *Am J Hum Genet*. 2012 Oct 5;91(4):760–2.
- 775 12. Chen Y, Choufani S, Grafodatskaya D, Butcher DT, Ferreira JC, Weksberg R. Cross-  
776 Reactive DNA Microarray Probes Lead to False Discovery of Autosomal Sex-Associated  
777 DNA Methylation. *Am J Hum Genet*. 2012 Oct 5;91(4):762–4.
- 778 13. Martin E, Smeester L, Bommarito PA, Grace MR, Boggess K, Kuban K, et al. Sexual  
779 epigenetic dimorphism in the human placenta: implications for susceptibility during the  
780 prenatal period. *Epigenomics*. 2017 Mar;9(3):267–78.

- 781 14. Mayne BT, Leemaqz SY, Smith AK, Breen J, Roberts CT, Bianco-Miotto T. Accelerated  
782 placental aging in early onset preeclampsia pregnancies identified by DNA methylation.  
783 *Epigenomics*. 2016 Nov 29;9(3):279–89.
- 784 15. Buckberry S, Bianco-Miotto T, Bent SJ, Dekker GA, Roberts CT. Integrative transcriptome  
785 meta-analysis reveals widespread sex-biased gene expression at the human fetal–maternal  
786 interface. *Mol Hum Reprod*. 2014 Aug;20(8):810–9.
- 787 16. Gonzalez TL, Sun T, Koeppel AF, Lee B, Wang ET, Farber CR, et al. Sex differences in the  
788 late first trimester human placenta transcriptome. *Biology of Sex Differences*. 2018 Jan  
789 15;9:4.
- 790 17. Wilson SL, Leavey K, Cox B, Robinson WP. The value of DNA methylation profiling in  
791 characterizing preeclampsia and intrauterine growth restriction. *bioRxiv*. 2017 Jun  
792 18;151290.
- 793 18. Konwar C, Price EM, Wang LQ, Wilson SL, Terry J, Robinson WP. DNA methylation  
794 profiling of acute chorioamnionitis-associated placentas and fetal membranes: insights into  
795 epigenetic variation in spontaneous preterm births. *Epigenetics & Chromatin*. 2018 Oct  
796 29;11(1):63.
- 797 19. Roifman M, Choufani S, Turinsky AL, Drewlo S, Keating S, Brudno M, et al. Genome-wide  
798 placental DNA methylation analysis of severely growth-discordant monochorionic twins  
799 reveals novel epigenetic targets for intrauterine growth restriction. *Clin Epigenetics*  
800 [Internet]. 2016 Jun 21 [cited 2020 Apr 15];8. Available from:  
801 <https://www.ncbi.nlm.nih.gov/pmc/articles/PMC4915063/>
- 802 20. Maccani JZ, Koestler DC, Houseman EA, Marsit CJ, Kelsey KT. Placental DNA methylation  
803 alterations associated with maternal tobacco smoking at the RUNX3 gene are also associated  
804 with gestational age. *Epigenomics*. 2013 Dec;5(6):619–30.

- 805 21. Green BB, Karagas MR, Punshon T, Jackson BP, Robbins DJ, Houseman EA, et al.  
806 Epigenome-Wide Assessment of DNA Methylation in the Placenta and Arsenic Exposure in  
807 the New Hampshire Birth Cohort Study (USA). *Environ Health Perspect.* 2016;124(8):1253–  
808 60.
- 809 22. Everson TM, Punshon T, Jackson BP, Hao K, Lambertini L, Chen J, et al. Cadmium-  
810 Associated Differential Methylation throughout the Placental Genome: Epigenome-Wide  
811 Association Study of Two U.S. Birth Cohorts. *Environ Health Perspect.* 2018  
812 22;126(1):017010.
- 813 23. Martin E, Ray PD, Smeester L, Grace MR, Boggess K, Fry RC. Epigenetics and  
814 Preeclampsia: Defining Functional Epimutations in the Preeclamptic Placenta Related to the  
815 TGF- $\beta$  Pathway. *PLOS ONE.* 2015 Oct 28;10(10):e0141294.
- 816 24. Paquette AG, Houseman EA, Green BB, Leseur C, Armstrong DA, Lester B, et al. Regions  
817 of variable DNA methylation in human placenta associated with newborn neurobehavior.  
818 *Epigenetics.* 2016 Jul 1;11(8):603–13.
- 819 25. Leavey K, Wilson SL, Bainbridge SA, Robinson WP, Cox BJ. Epigenetic regulation of  
820 placental gene expression in transcriptional subtypes of preeclampsia. *Clin Epigenetics*  
821 [Internet]. 2018 Mar 2 [cited 2018 Jun 12];10. Available from:  
822 <https://www.ncbi.nlm.nih.gov/pmc/articles/PMC5833042/>
- 823 26. Hanna CW, Peñaherrera MS, Saadeh H, Andrews S, McFadden DE, Kelsey G, et al.  
824 Pervasive polymorphic imprinted methylation in the human placenta. *Genome Res.* 2016  
825 Jun;26(6):756–67.
- 826 27. Wilson SL, Leavey K, Cox BJ, Robinson WP. Mining DNA methylation alterations towards  
827 a classification of placental pathologies. *Hum Mol Genet.* 2018 Jan 1;27(1):135–46.

- 828 28. Yuan V, Price EM, Del Gobbo G, Mostafavi S, Cox B, Binder AM, et al. Accurate ethnicity  
829 prediction from placental DNA methylation data. *Epigenetics & Chromatin*. 2019 Aug  
830 9;12(1):51.
- 831 29. Price EM, Robinson WP. Adjusting for Batch Effects in DNA Methylation Microarray Data,  
832 a Lesson Learned. *Front Genet* [Internet]. 2018 [cited 2018 Apr 17];9. Available from:  
833 <https://www.frontiersin.org/articles/10.3389/fgene.2018.00083/full>
- 834 30. Heiss JA, Just AC. Identifying mislabeled and contaminated DNA methylation microarray  
835 data: an extended quality control toolset with examples from GEO. *Clinical Epigenetics*.  
836 2018 Jun 1;10(1):73.
- 837 31. Chen Y, Lemire M, Choufani S, Butcher DT, Grafodatskaya D, Zanke BW, et al. Discovery  
838 of cross-reactive probes and polymorphic CpGs in the Illumina Infinium  
839 HumanMethylation450 microarray. *Epigenetics*. 2013 Feb 1;8(2):203–9.
- 840 32. Price ME, Cotton AM, Lam LL, Farré P, Emberly E, Brown CJ, et al. Additional annotation  
841 enhances potential for biologically-relevant analysis of the Illumina Infinium  
842 HumanMethylation450 BeadChip array. *Epigenetics & Chromatin*. 2013;6(1):4.
- 843 33. Edgar RD, Jones MJ, Robinson WP, Kobor MS. An empirically driven data reduction method  
844 on the human 450K methylation array to remove tissue specific non-variable CpGs. *Clinical*  
845 *Epigenetics*. 2017 Feb 2;9(1):11.
- 846 34. Aryee MJ, Jaffe AE, Corrada-Bravo H, Ladd-Acosta C, Feinberg AP, Hansen KD, et al.  
847 Minfi: a flexible and comprehensive Bioconductor package for the analysis of Infinium DNA  
848 methylation microarrays. *Bioinformatics*. 2014 May 15;30(10):1363–9.

- 849 35. Teschendorff AE, Marabita F, Lechner M, Bartlett T, Tegner J, Gomez-Cabrero D, et al. A  
850 beta-mixture quantile normalization method for correcting probe design bias in Illumina  
851 Infinium 450 k DNA methylation data. *Bioinformatics*. 2013 Jan 15;29(2):189–96.
- 852 36. Smit A, Hubley R. RepeatMasker Open-4.0 [Internet]. 2013. Available from:  
853 <http://www.repeatmasker.org>
- 854 37. Ritchie ME, Phipson B, Wu D, Hu Y, Law CW, Shi W, et al. limma powers differential  
855 expression analyses for RNA-sequencing and microarray studies. *Nucleic Acids Res*. 2015  
856 Apr 20;43(7):e47–e47.
- 857 38. Phipson B, Maksimovic J, Oshlack A. missMethyl: an R package for analyzing data from  
858 Illumina’s HumanMethylation450 platform. *Bioinformatics*. 2016 Jan 15;32(2):286–8.
- 859 39. Kulakovskiy IV, Vorontsov IE, Yevshin IS, Sharipov RN, Fedorova AD, Rumynskiy EI, et  
860 al. HOCOMOCO: towards a complete collection of transcription factor binding models for  
861 human and mouse via large-scale ChIP-Seq analysis. *Nucleic Acids Res*. 2018 Jan  
862 4;46(Database issue):D252–9.
- 863 40. Bailey TL, Machanick P. Inferring direct DNA binding from ChIP-seq. *Nucleic Acids Res*.  
864 2012 Sep 1;40(17):e128.
- 865 41. Bailey TL, Boden M, Buske FA, Frith M, Grant CE, Clementi L, et al. MEME Suite: tools  
866 for motif discovery and searching. *Nucleic Acids Res*. 2009 Jul 1;37(suppl\_2):W202–8.
- 867 42. Wilson S, Qi J, Filipp FV. Refinement of the androgen response element based on ChIP-Seq  
868 in androgen-insensitive and androgen-responsive prostate cancer cell lines. *Scientific*  
869 *Reports*. 2016 Sep 14;6(1):32611.
- 870 43. Grober OM, Mutarelli M, Giurato G, Ravo M, Cicatiello L, De Filippo MR, et al. Global  
871 analysis of estrogen receptor beta binding to breast cancer cell genome reveals an extensive

- 872 interplay with estrogen receptor alpha for target gene regulation. *BMC Genomics*. 2011 Jan  
873 14;12(1):36.
- 874 44. Leavey Katherine, Benton Samantha J., Gynspan David, Kingdom John C., Bainbridge  
875 Shannon A., Cox Brian J. Unsupervised Placental Gene Expression Profiling Identifies  
876 Clinically Relevant Subclasses of Human Preeclampsia. *Hypertension*. 2016 Jul 1;68(1):137–  
877 47.
- 878 45. Peters TJ, Buckley MJ, Statham AL, Pidsley R, Samaras K, Lord RV, et al. De novo  
879 identification of differentially methylated regions in the human genome. 2015;16.
- 880 46. Feinberg AP, Irizarry RA. Stochastic epigenetic variation as a driving force of development,  
881 evolutionary adaptation, and disease. *PNAS*. 2010 Jan 26;107(suppl 1):1757–64.
- 882 47. Price EM, Cotton AM, Peñaherrera MS, McFadden DE, Kobor MS, Robinson W. Different  
883 measures of “genome-wide” DNA methylation exhibit unique properties in placental and  
884 somatic tissues. *Epigenetics*. 2012 Jun 1;7(6):652–63.
- 885 48. Konwar C, Del Gobbo G, Yuan V, Robinson WP. Considerations when processing and  
886 interpreting genomics data of the placenta. *Placenta*. 2019 Sep;84:57–62.
- 887 49. Costanzo V, Bardelli A, Siena S, Abrignani S. Exploring the links between cancer and  
888 placenta development. *Open Biol [Internet]*. 2018 Jun 27 [cited 2021 Jan 25];8(6). Available  
889 from: <https://www.ncbi.nlm.nih.gov/pmc/articles/PMC6030113/>
- 890 50. Kane MD, Jatkoa TA, Stumpf CR, Lu J, Thomas JD, Madore SJ. Assessment of the  
891 sensitivity and specificity of oligonucleotide (50mer) microarrays. *Nucleic Acids Res*. 2000  
892 Nov 15;28(22):4552–7.



- 893 51. Blair JD, Yuen RKC, Lim BK, McFadden DE, von Dadelszen P, Robinson WP. Widespread  
894 DNA hypomethylation at gene enhancer regions in placentas associated with early-onset pre-  
895 eclampsia. *Mol Hum Reprod*. 2013 Oct;19(10):697–708.
- 896 52. McCarthy NS, Melton PE, Cadby G, Yazar S, Franchina M, Moses EK, et al. Meta-analysis  
897 of human methylation data for evidence of sex-specific autosomal patterns. *BMC Genomics*  
898 [Internet]. 2014 Nov 18 [cited 2018 Apr 13];15(1). Available from:  
899 <https://www.ncbi.nlm.nih.gov/pmc/articles/PMC4255932/>
- 900 53. Singmann P, Shem-Tov D, Wahl S, Grallert H, Fiorito G, Shin S-Y, et al. Characterization of  
901 whole-genome autosomal differences of DNA methylation between men and women.  
902 *Epigenetics Chromatin* [Internet]. 2015 Oct 19 [cited 2018 Apr 18];8. Available from:  
903 <https://www.ncbi.nlm.nih.gov/pmc/articles/PMC4615866/>
- 904 54. Yousefi P, Huen K, Davé V, Barcellos L, Eskenazi B, Holland N. Sex differences in DNA  
905 methylation assessed by 450 K BeadChip in newborns. *BMC Genomics* [Internet]. 2015 Nov  
906 9 [cited 2018 Apr 18];16. Available from:  
907 <https://www.ncbi.nlm.nih.gov/pmc/articles/PMC4640166/>
- 908 55. Xu H, Wang F, Liu Y, Yu Y, Gelernter J, Zhang H. Sex-biased methylome and transcriptome  
909 in human prefrontal cortex. *Hum Mol Genet*. 2014 Mar 1;23(5):1260–70.
- 910 56. Hall E, Volkov P, Dayeh T, Esguerra JLS, Salö S, Eliasson L, et al. Sex differences in the  
911 genome-wide DNA methylation pattern and impact on gene expression, microRNA levels  
912 and insulin secretion in human pancreatic islets. *Genome Biol* [Internet]. 2014 [cited 2018  
913 Apr 24];15(12). Available from: <https://www.ncbi.nlm.nih.gov/pmc/articles/PMC4256841/>
- 914 57. Gong S, Johnson MD, Dopierala J, Gaccioli F, Sovio U, Constância M, et al. Genome-wide  
915 oxidative bisulfite sequencing identifies sex-specific methylation differences in the human  
916 placenta. *Epigenetics*. 2018 Jan 29;0(0):1–12.

- 917 58. Sandoval J, Heyn H, Moran S, Serra-Musach J, Pujana MA, Bibikova M, et al. Validation of  
918 a DNA methylation microarray for 450,000 CpG sites in the human genome. *Epigenetics*.  
919 2011 Jun;6(6):692–702.
- 920 59. Trolle C, Nielsen MM, Skakkebæk A, Lamy P, Vang S, Hedegaard J, et al. Widespread DNA  
921 hypomethylation and differential gene expression in Turner syndrome. *Scientific Reports*.  
922 2016 Sep 30;6:34220.
- 923 60. Skakkebæk A, Nielsen MM, Trolle C, Vang S, Hornshøj H, Hedegaard J, et al. DNA  
924 hypermethylation and differential gene expression associated with Klinefelter syndrome.  
925 *Scientific Reports*. 2018 Sep 13;8(1):13740.
- 926 61. Cotton AM, Avila L, Penaherrera MS, Affleck JG, Robinson WP, Brown CJ. Inactive X  
927 chromosome-specific reduction in placental DNA methylation. *Hum Mol Genet*. 2009 Oct  
928 1;18(19):3544–52.
- 929 62. Gauster M, Blaschitz A, Siwetz M, Huppertz B. Keratins in the human trophoblast. *Histol*  
930 *Histopathol*. 2013 Jul;28(7):817–25.
- 931 63. Yuan V, Hui D, Yin Y, Peñaherrera MS, Beristain AG, Robinson WP. Cell-specific  
932 characterization of the placental methylome. *BMC Genomics*. 2021 Jan 6;22(1):6.
- 933 64. Cassandri M, Smirnov A, Novelli F, Pitolli C, Agostini M, Malewicz M, et al. Zinc-finger  
934 proteins in health and disease. *Cell Death Discov*. 2017;3:17071.
- 935 65. Kent WJ, Sugnet CW, Furey TS, Roskin KM, Pringle TH, Zahler AM, et al. The human  
936 genome browser at UCSC. *Genome Res*. 2002 Jun;12(6):996–1006.
- 937 66. Karlebach G, Veiga DFT, Mays AD, Kesarwani AK, Danis D, Kararigas G, et al. The impact  
938 of sex on alternative splicing. :24.

- 939 67. Künzig HJ, Meyer U, Schmitz-Roeckerath B, Broer KH. Influence of fetal sex on the  
940 concentration of amniotic fluid testosterone: Antenatal sex determination? Arch Gynak.  
941 1977;223(2):75–84.
- 942 68. Yoon H-G, Chan DW, Reynolds AB, Qin J, Wong J. N-CoR Mediates DNA Methylation-  
943 Dependent Repression through a Methyl CpG Binding Protein Kaiso. Molecular Cell. 2003  
944 Sep 1;12(3):723–34.
- 945 69. Cavazos-Rehg PA, Krauss MJ, Spitznagel EL, Bommarito K, Madden T, Olsen MA, et al.  
946 Maternal age and risk of labor and delivery complications. Matern Child Health J. 2015  
947 Jun;19(6):1202–11.
- 948 70. Popejoy AB, Fullerton SM. Genomics is failing on diversity. Nature. 2016 Oct  
949 12;538(7624):161–4.
- 950 71. Kessler MD, Yerges-Armstrong L, Taub MA, Shetty AC, Maloney K, Jeng LJB, et al.  
951 Challenges and disparities in the application of personalized genomic medicine to populations  
952 with African ancestry. Nature Communications. 2016 Oct 11;7(1):12521.

Figure 1

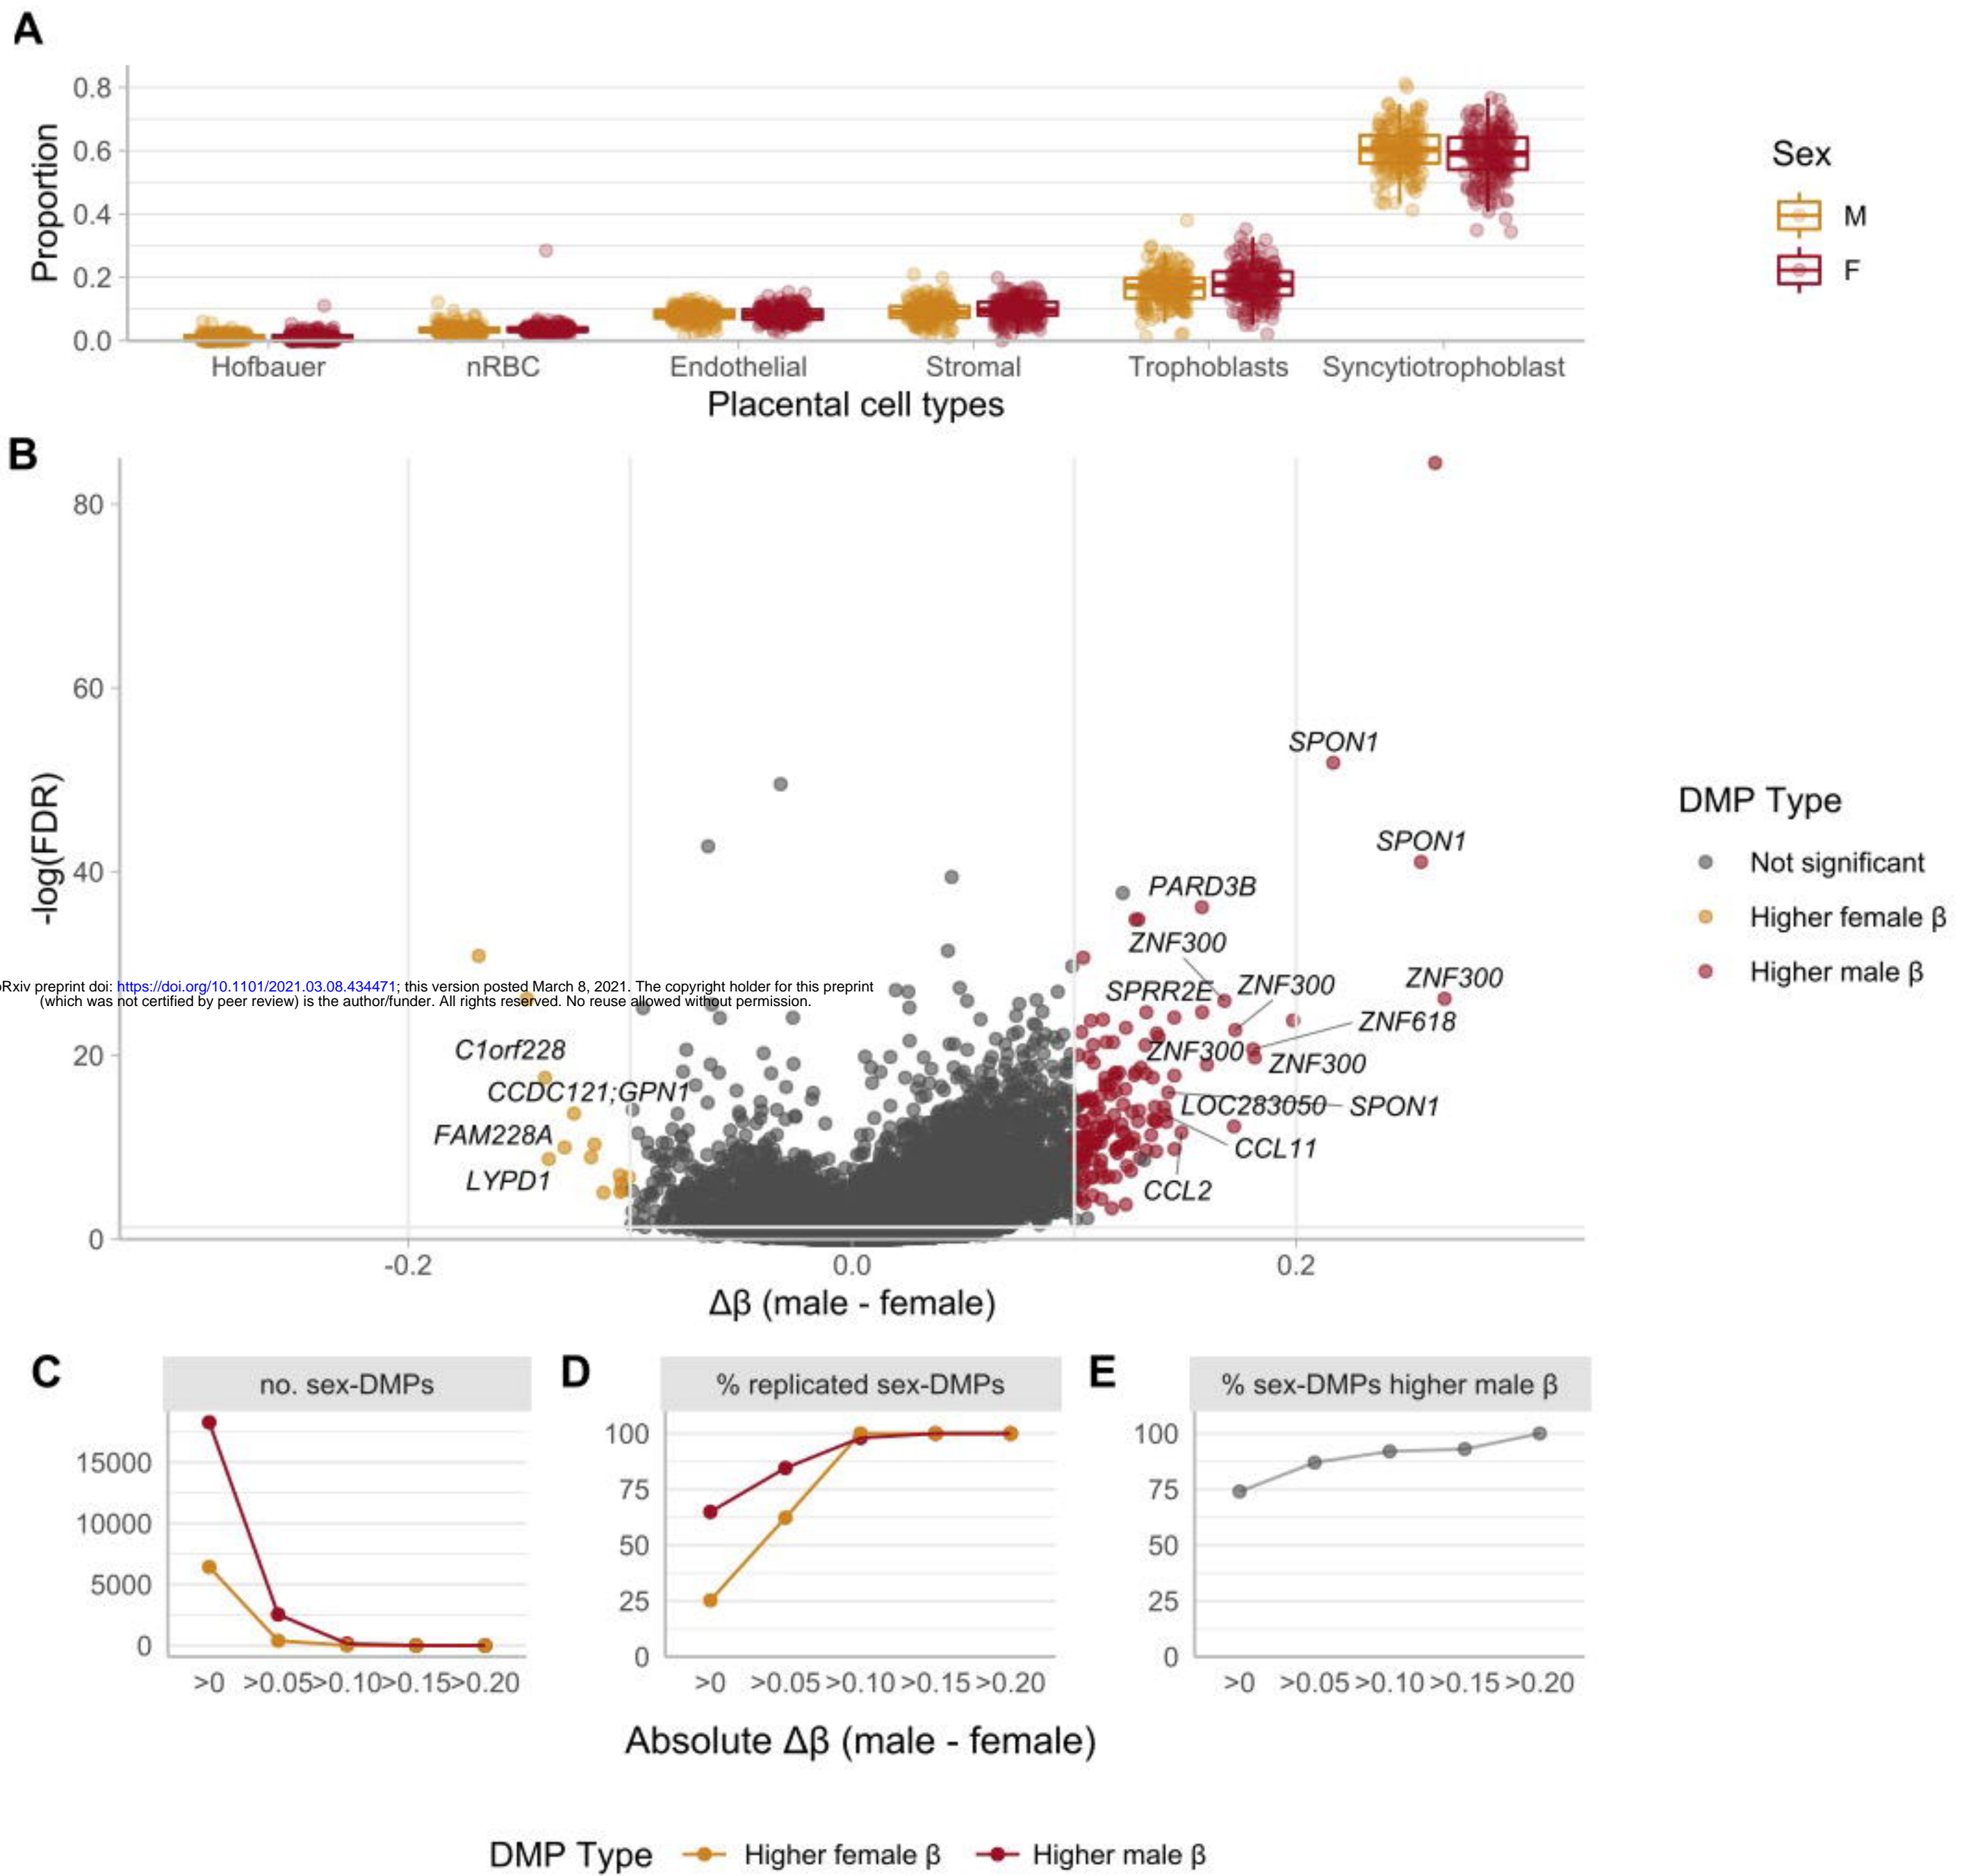

Figure 2

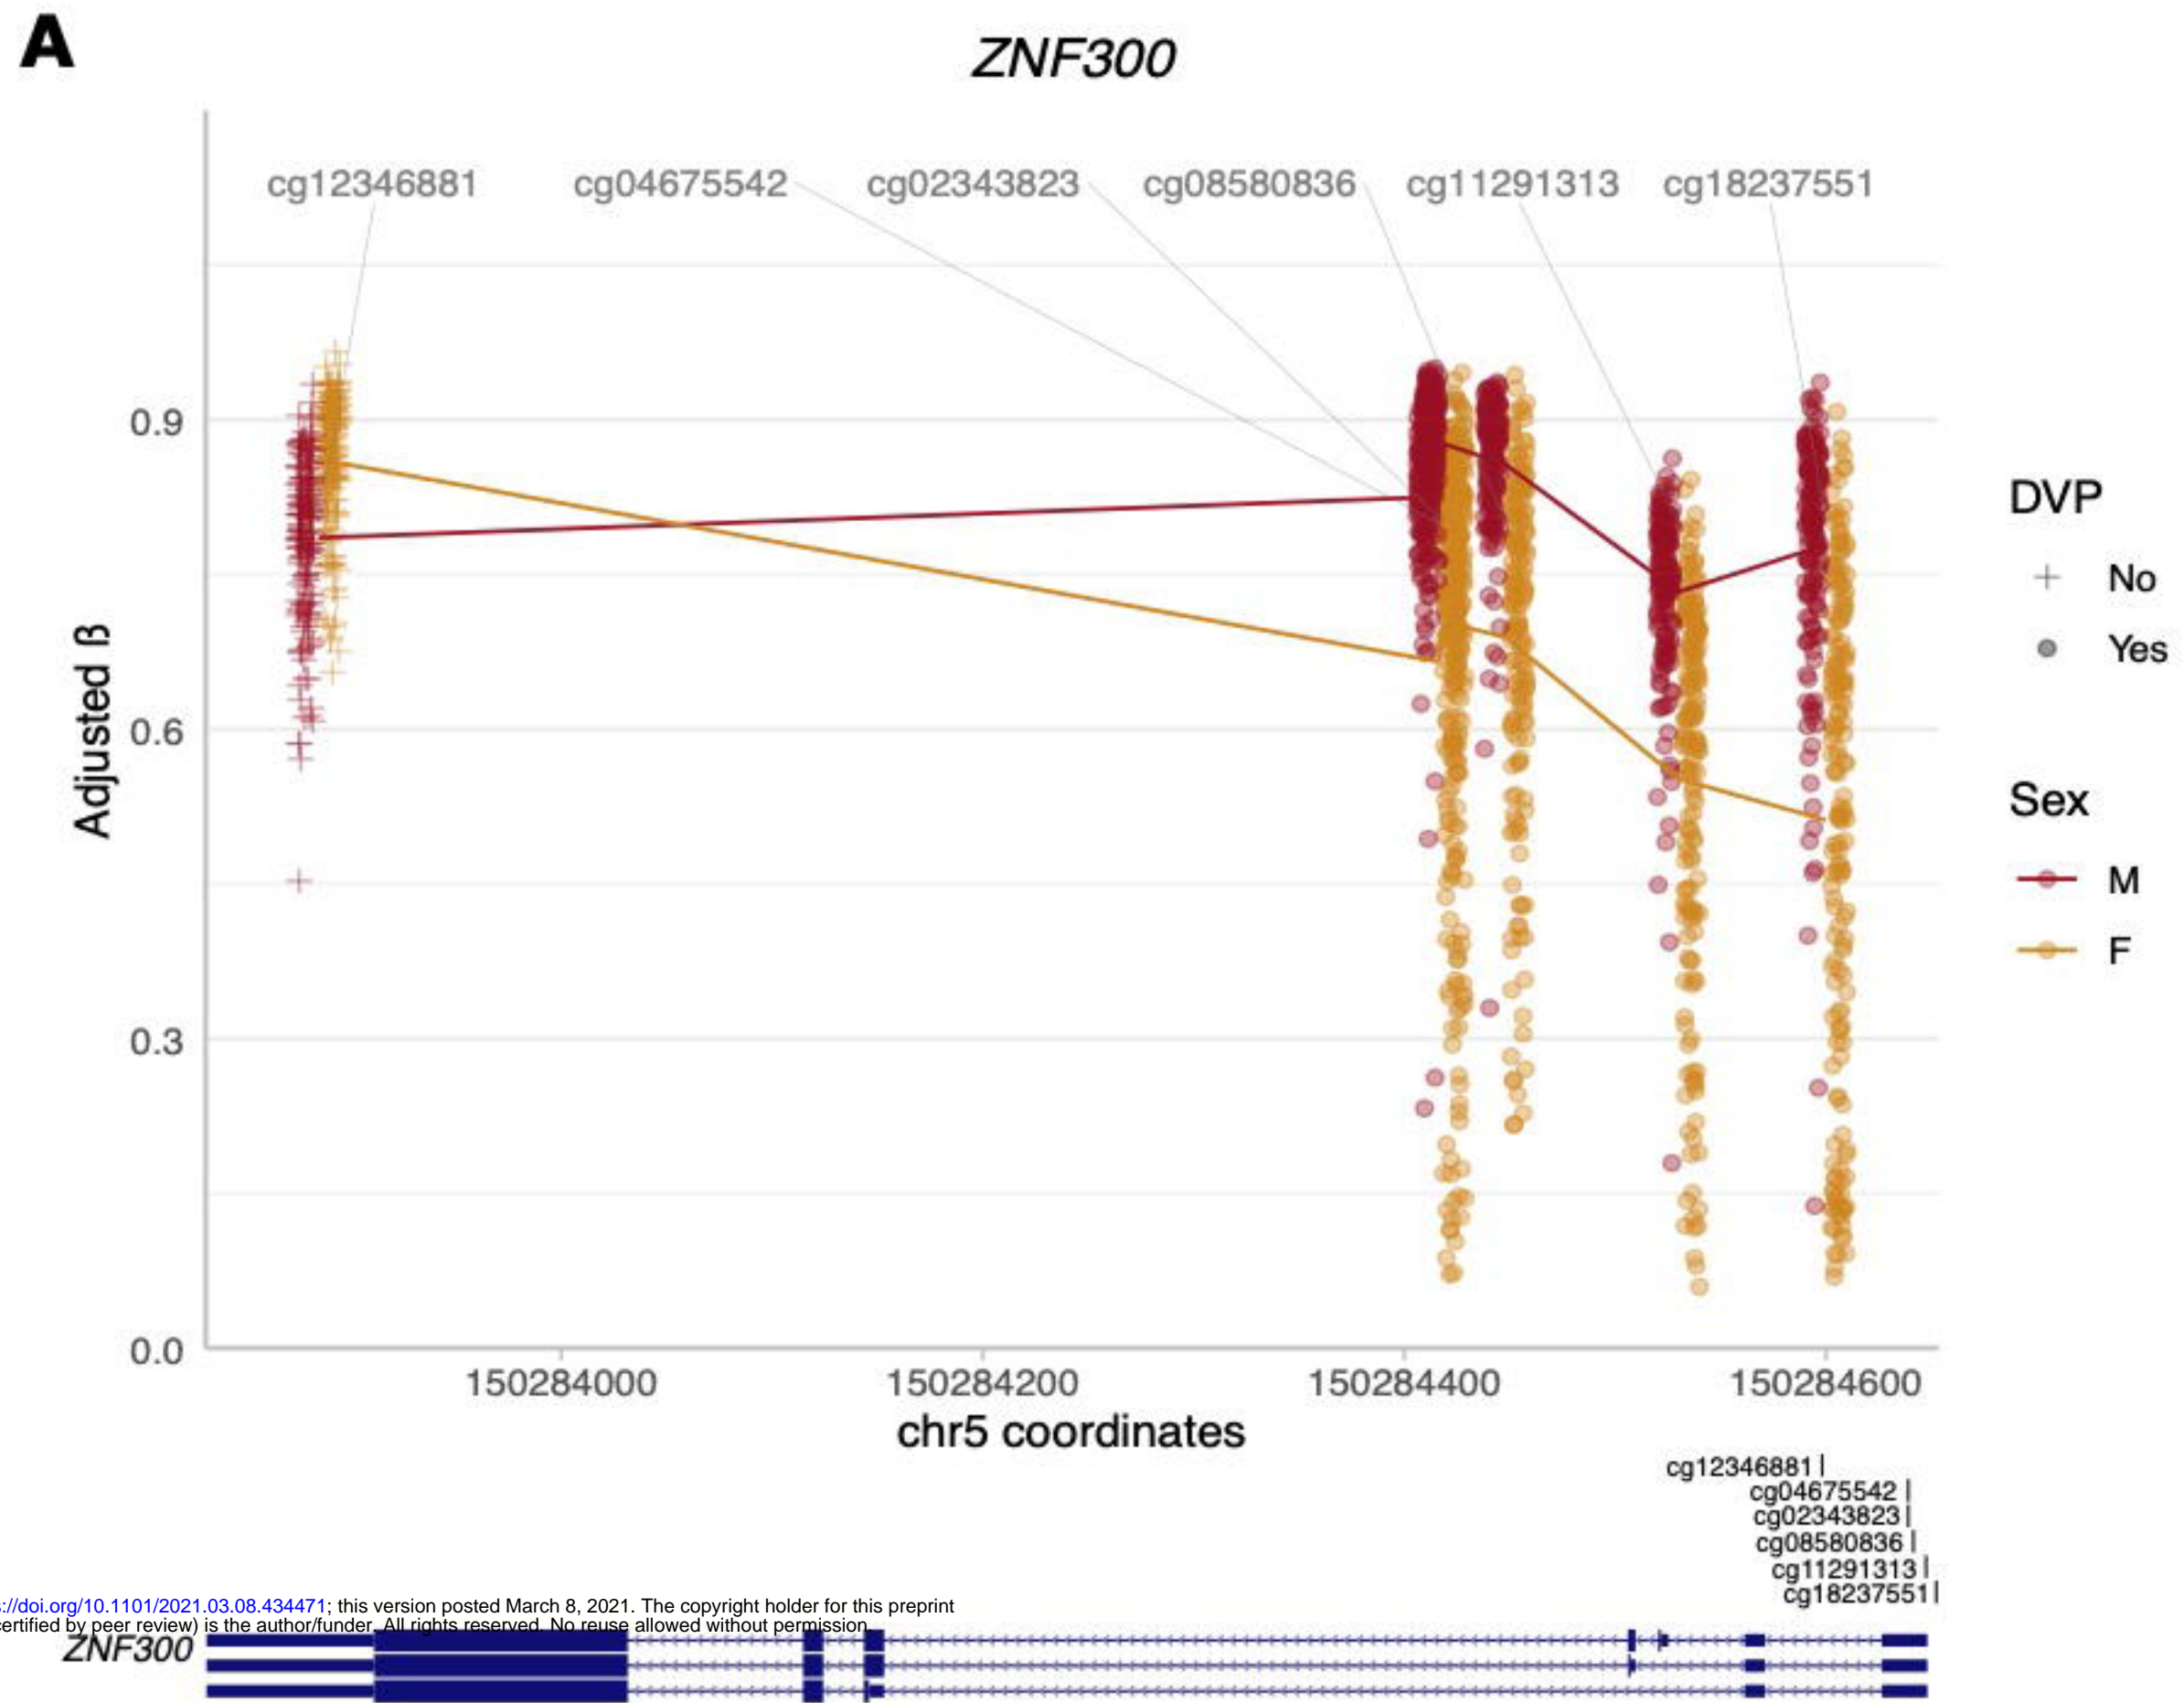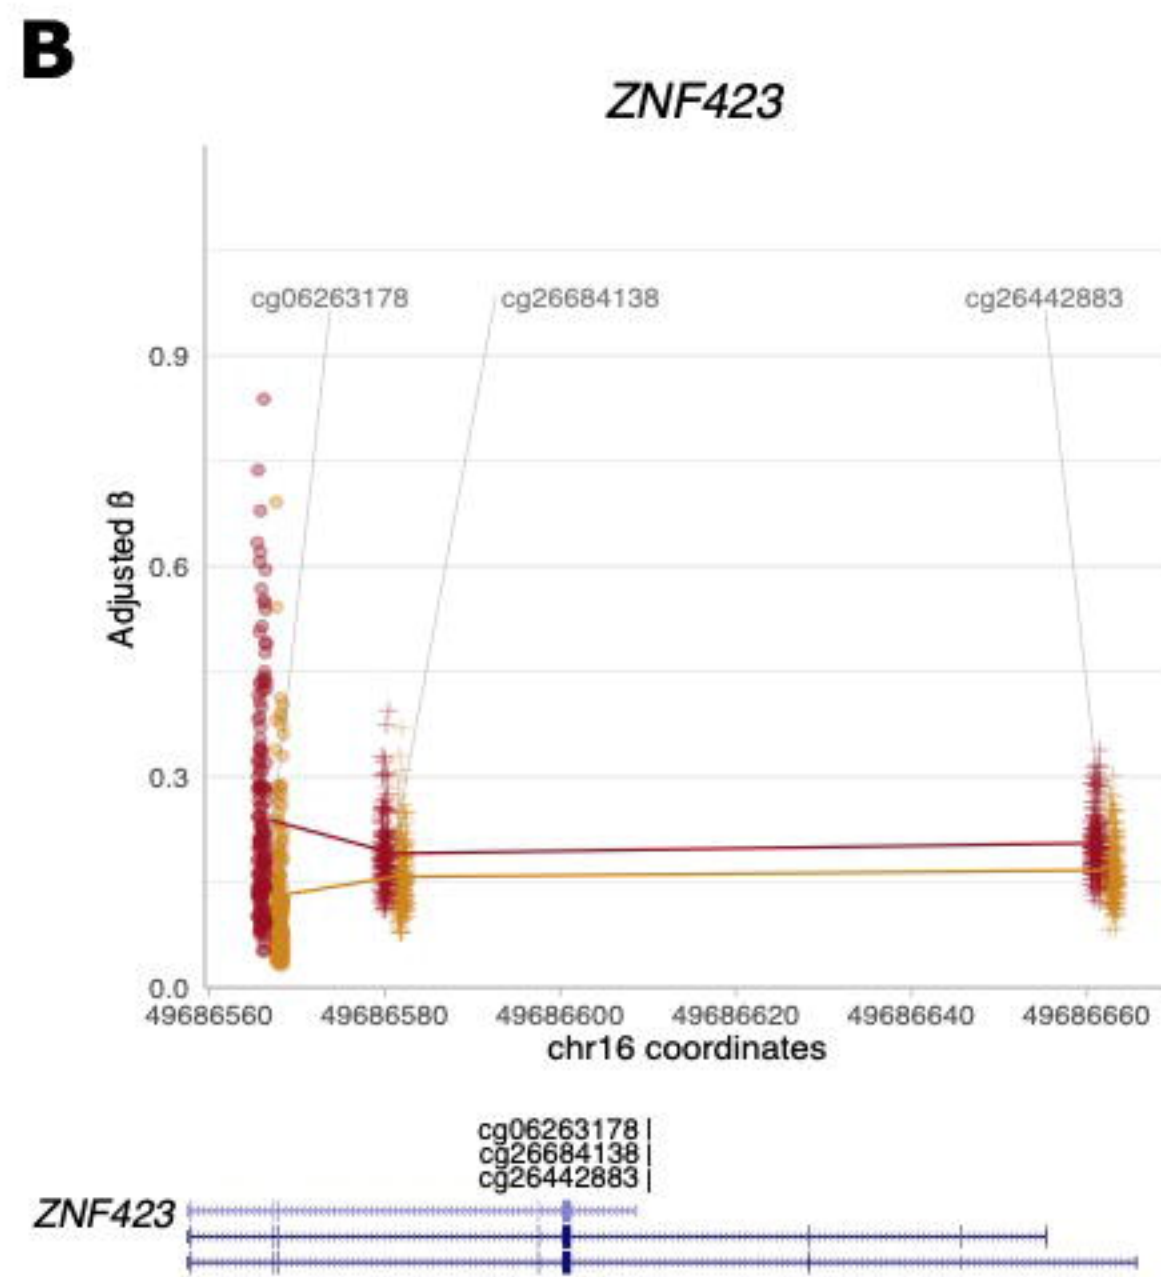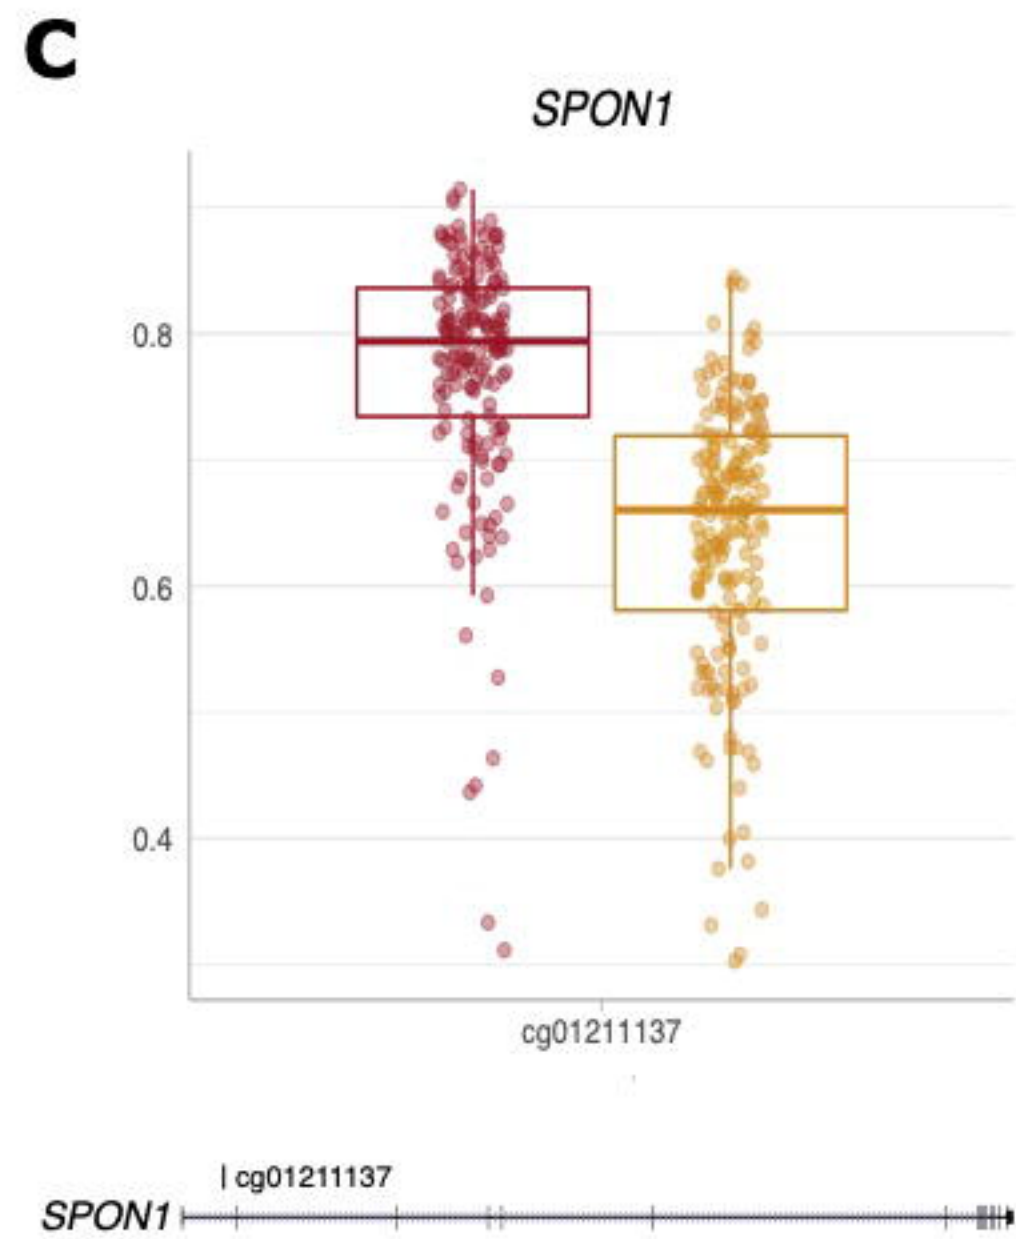

Figure 3

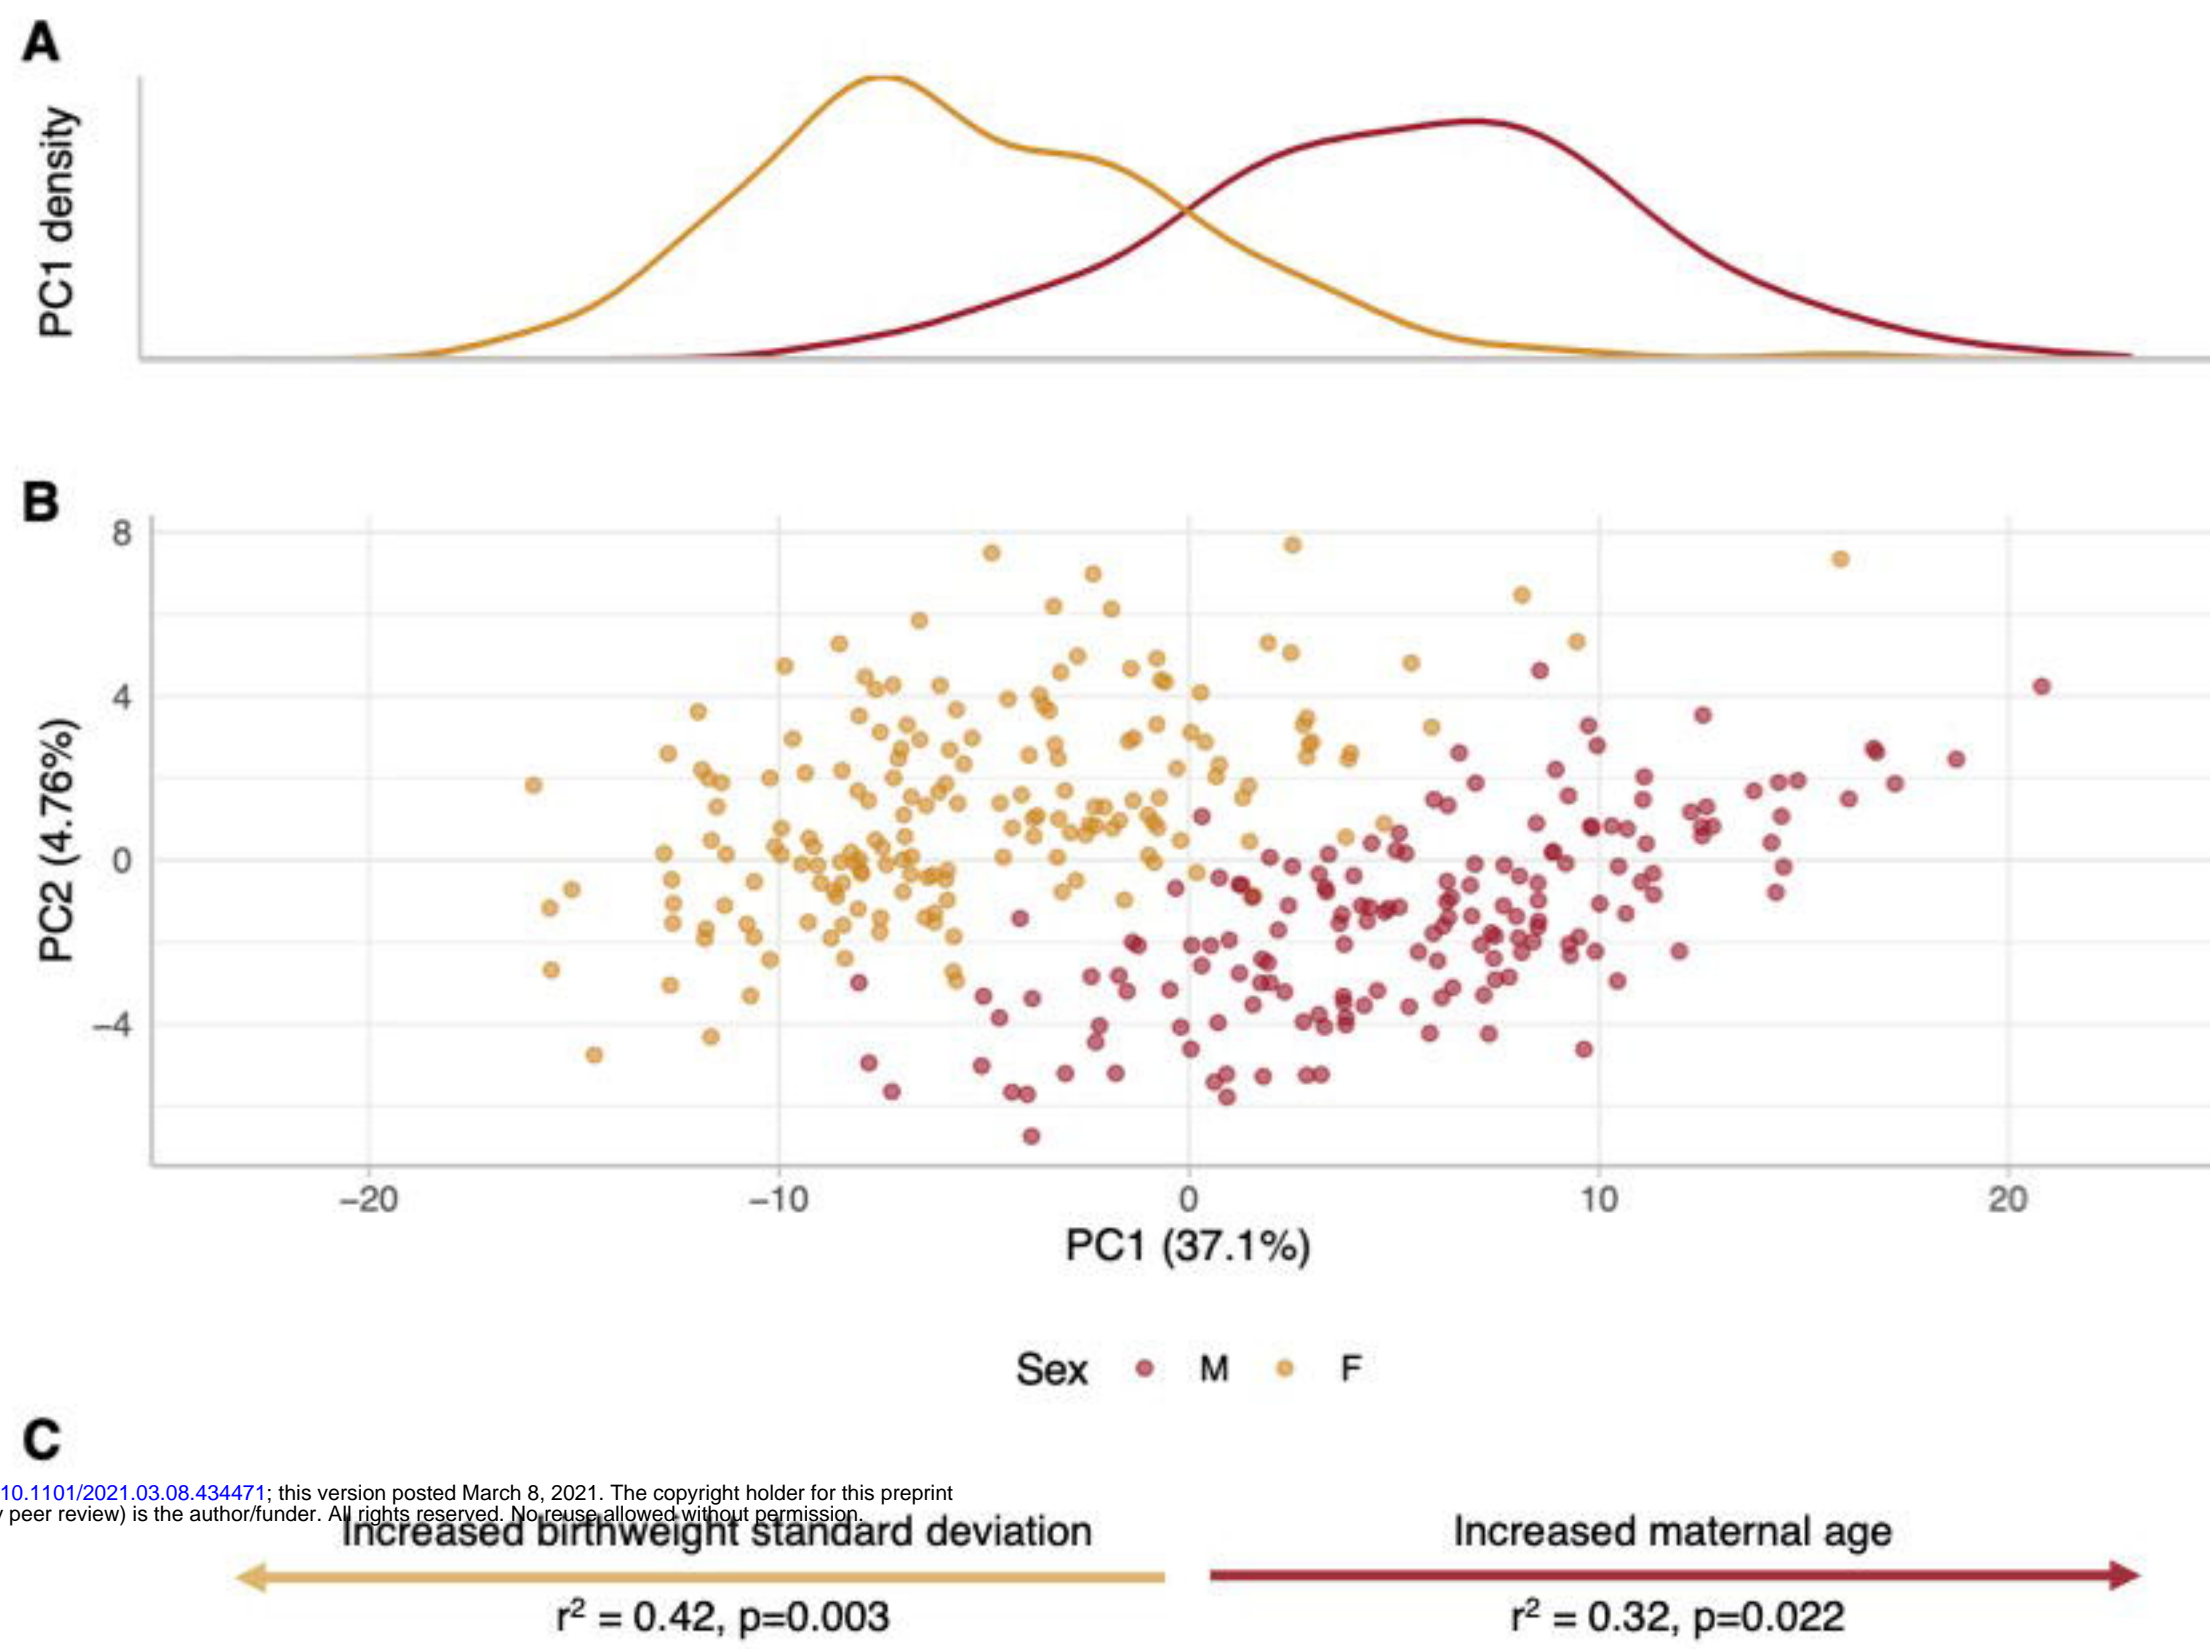

Source: http://biorxiv.org/content/10.1101/2021.03.08.434471v1.full.pdf
